# Supplementary material
Source: HighWire-hosted journal article supplement (https://tsaco.smart01.highwire.org/content/3/1/e000177)

# Surgical Patients (%)

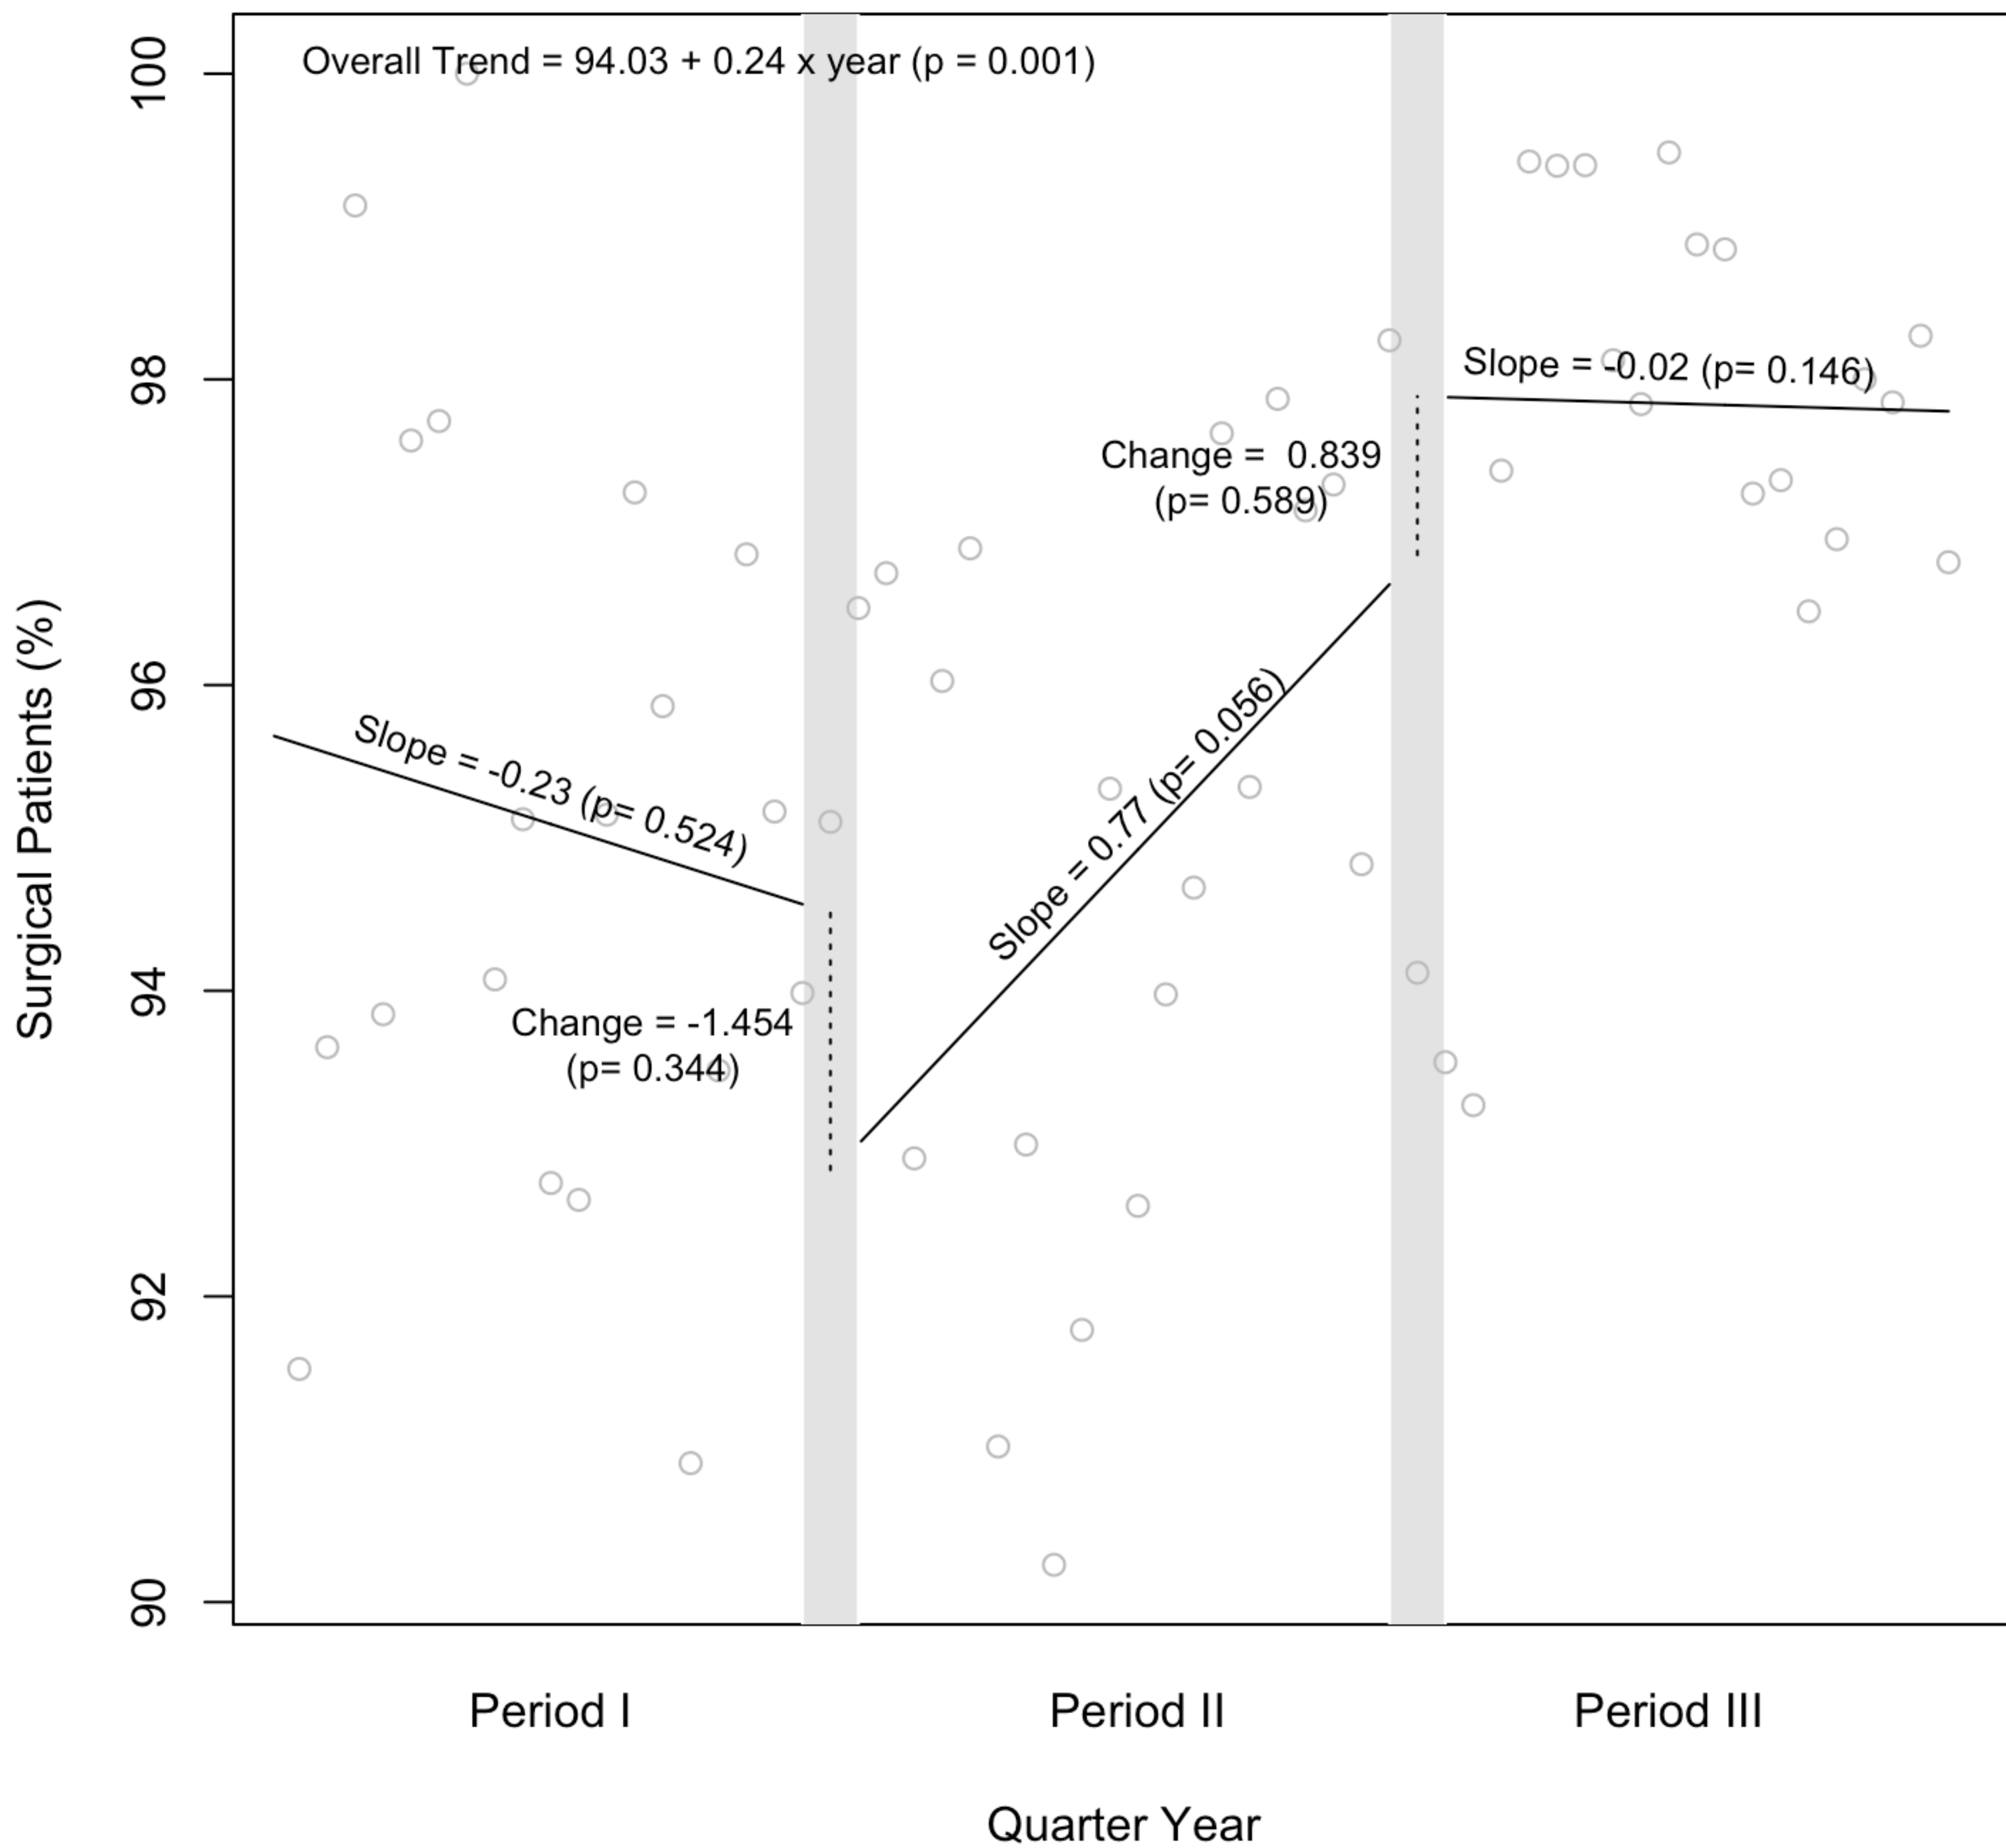

# Mean Age

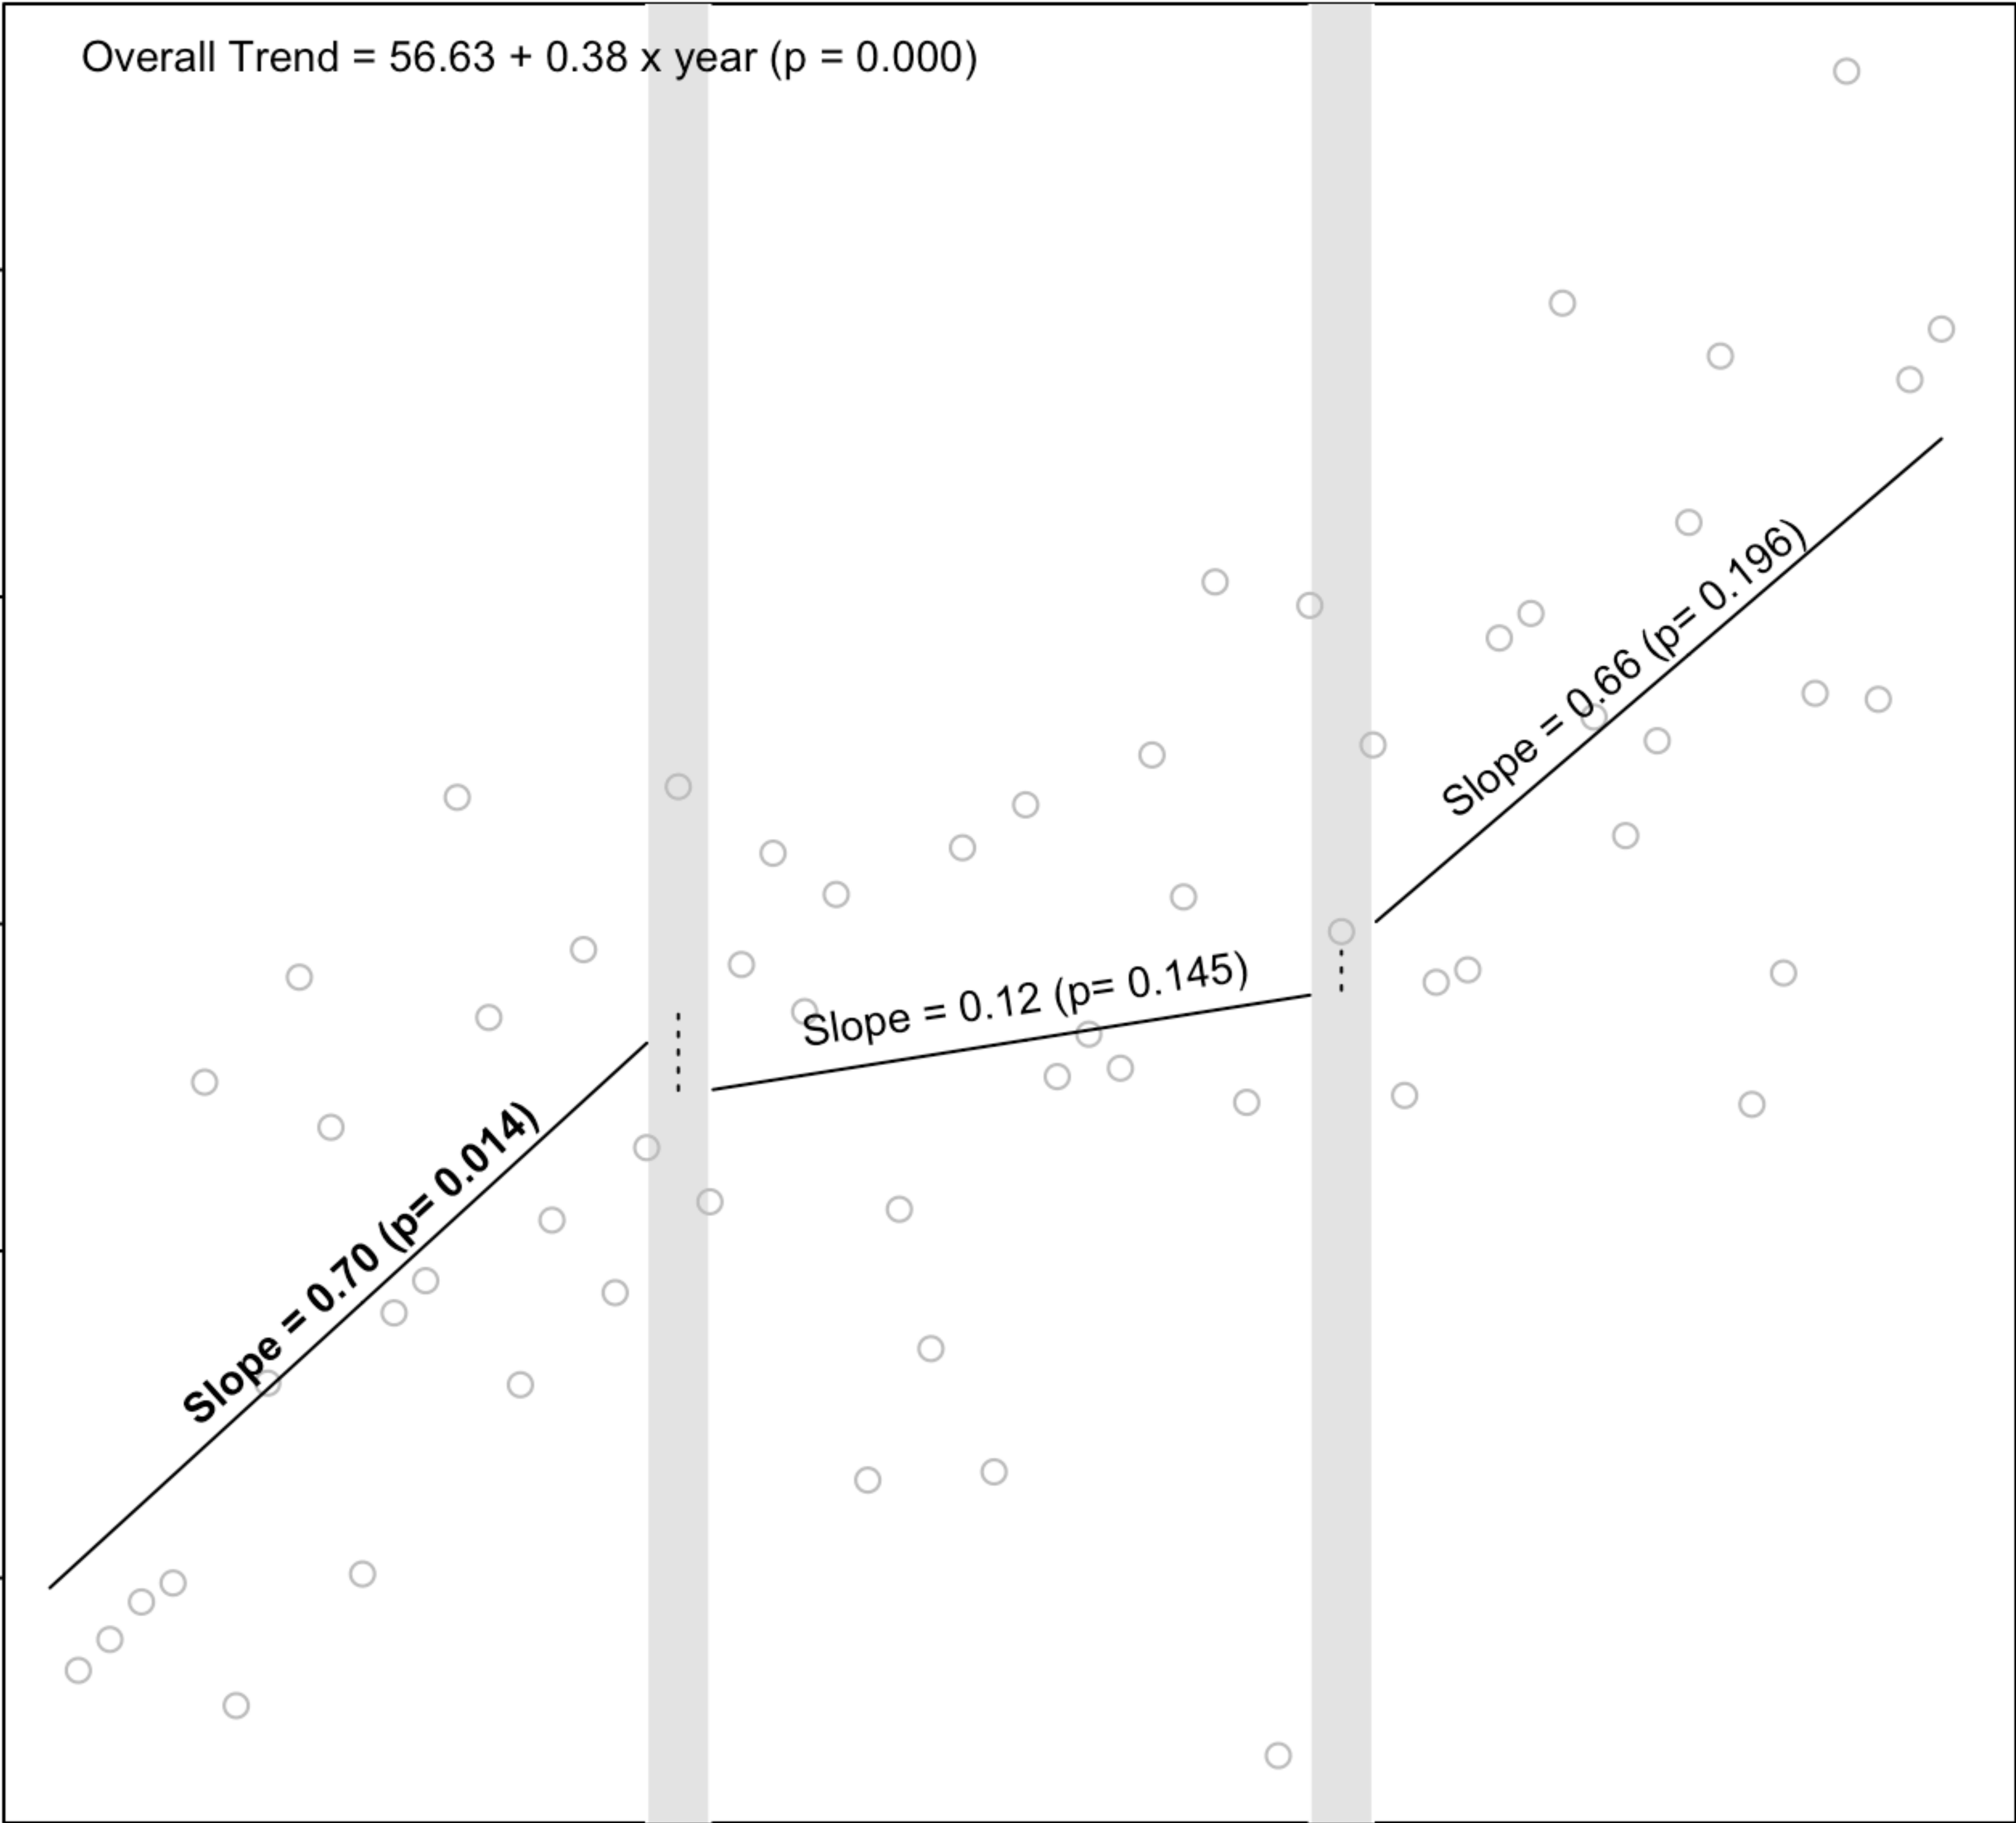

Period I

Period II

Period III

Quarter Year

# Mean Admission Duration (hours)

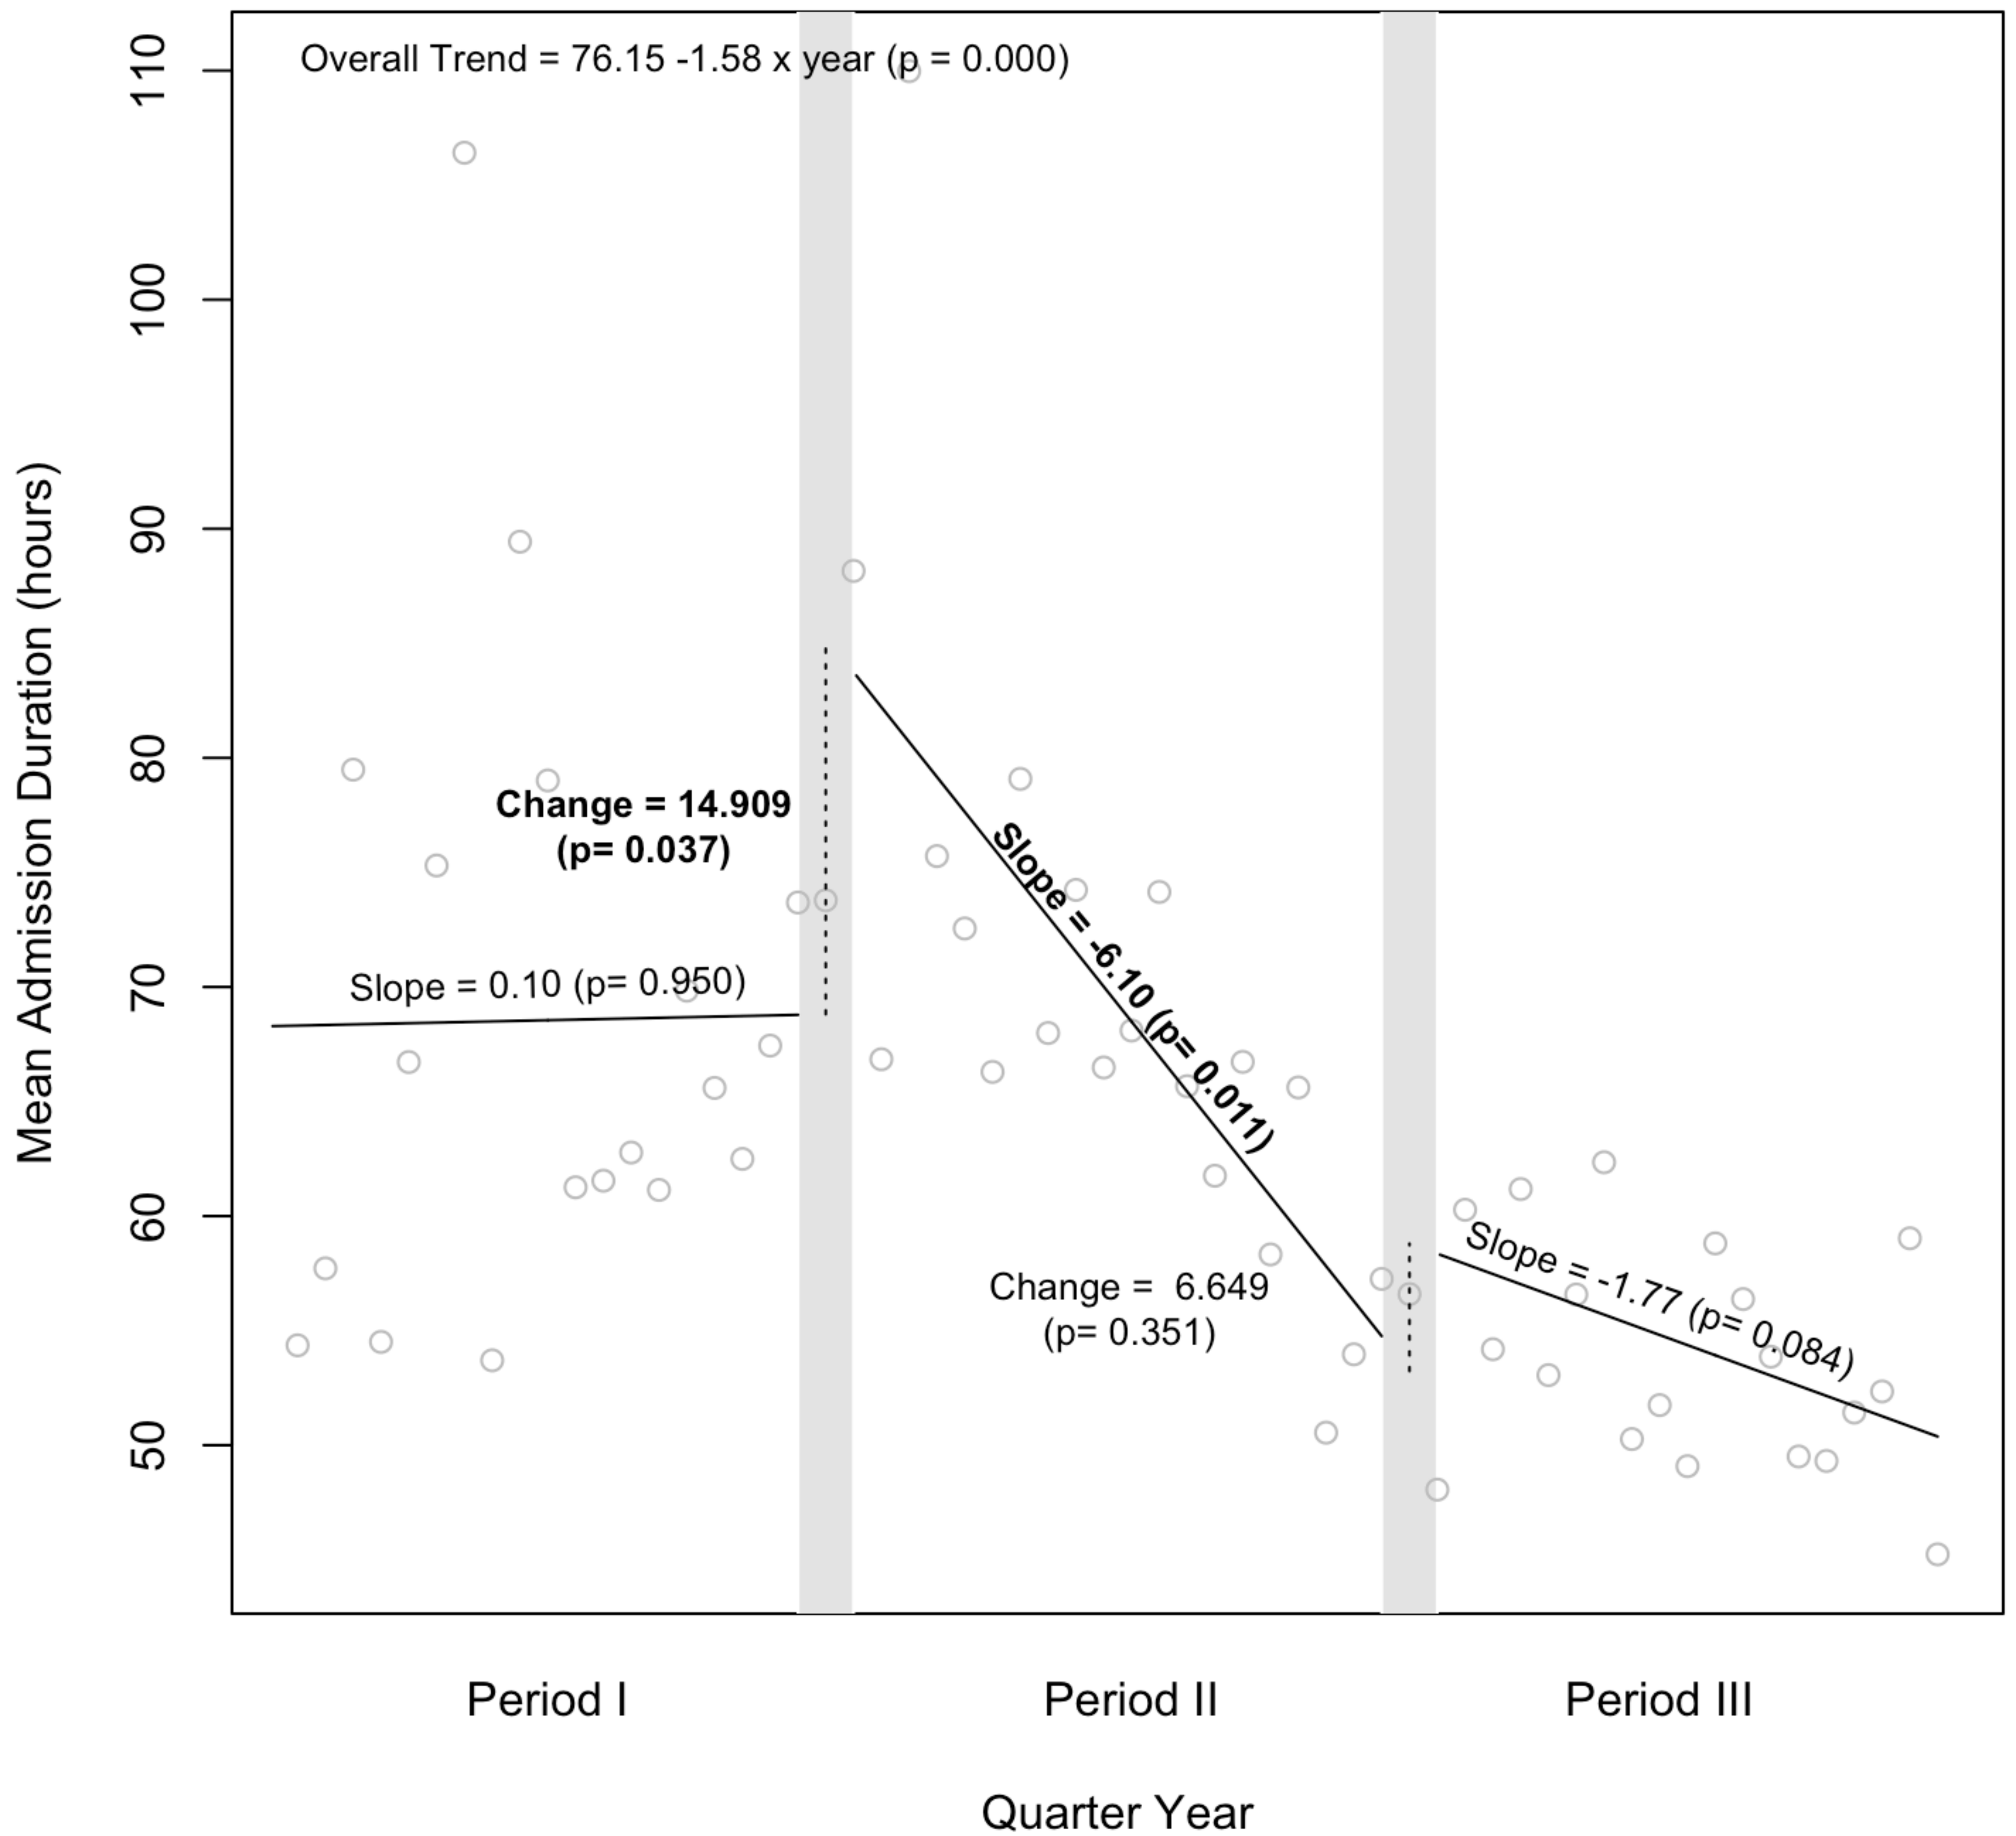

# Re-admissions from ward (%)

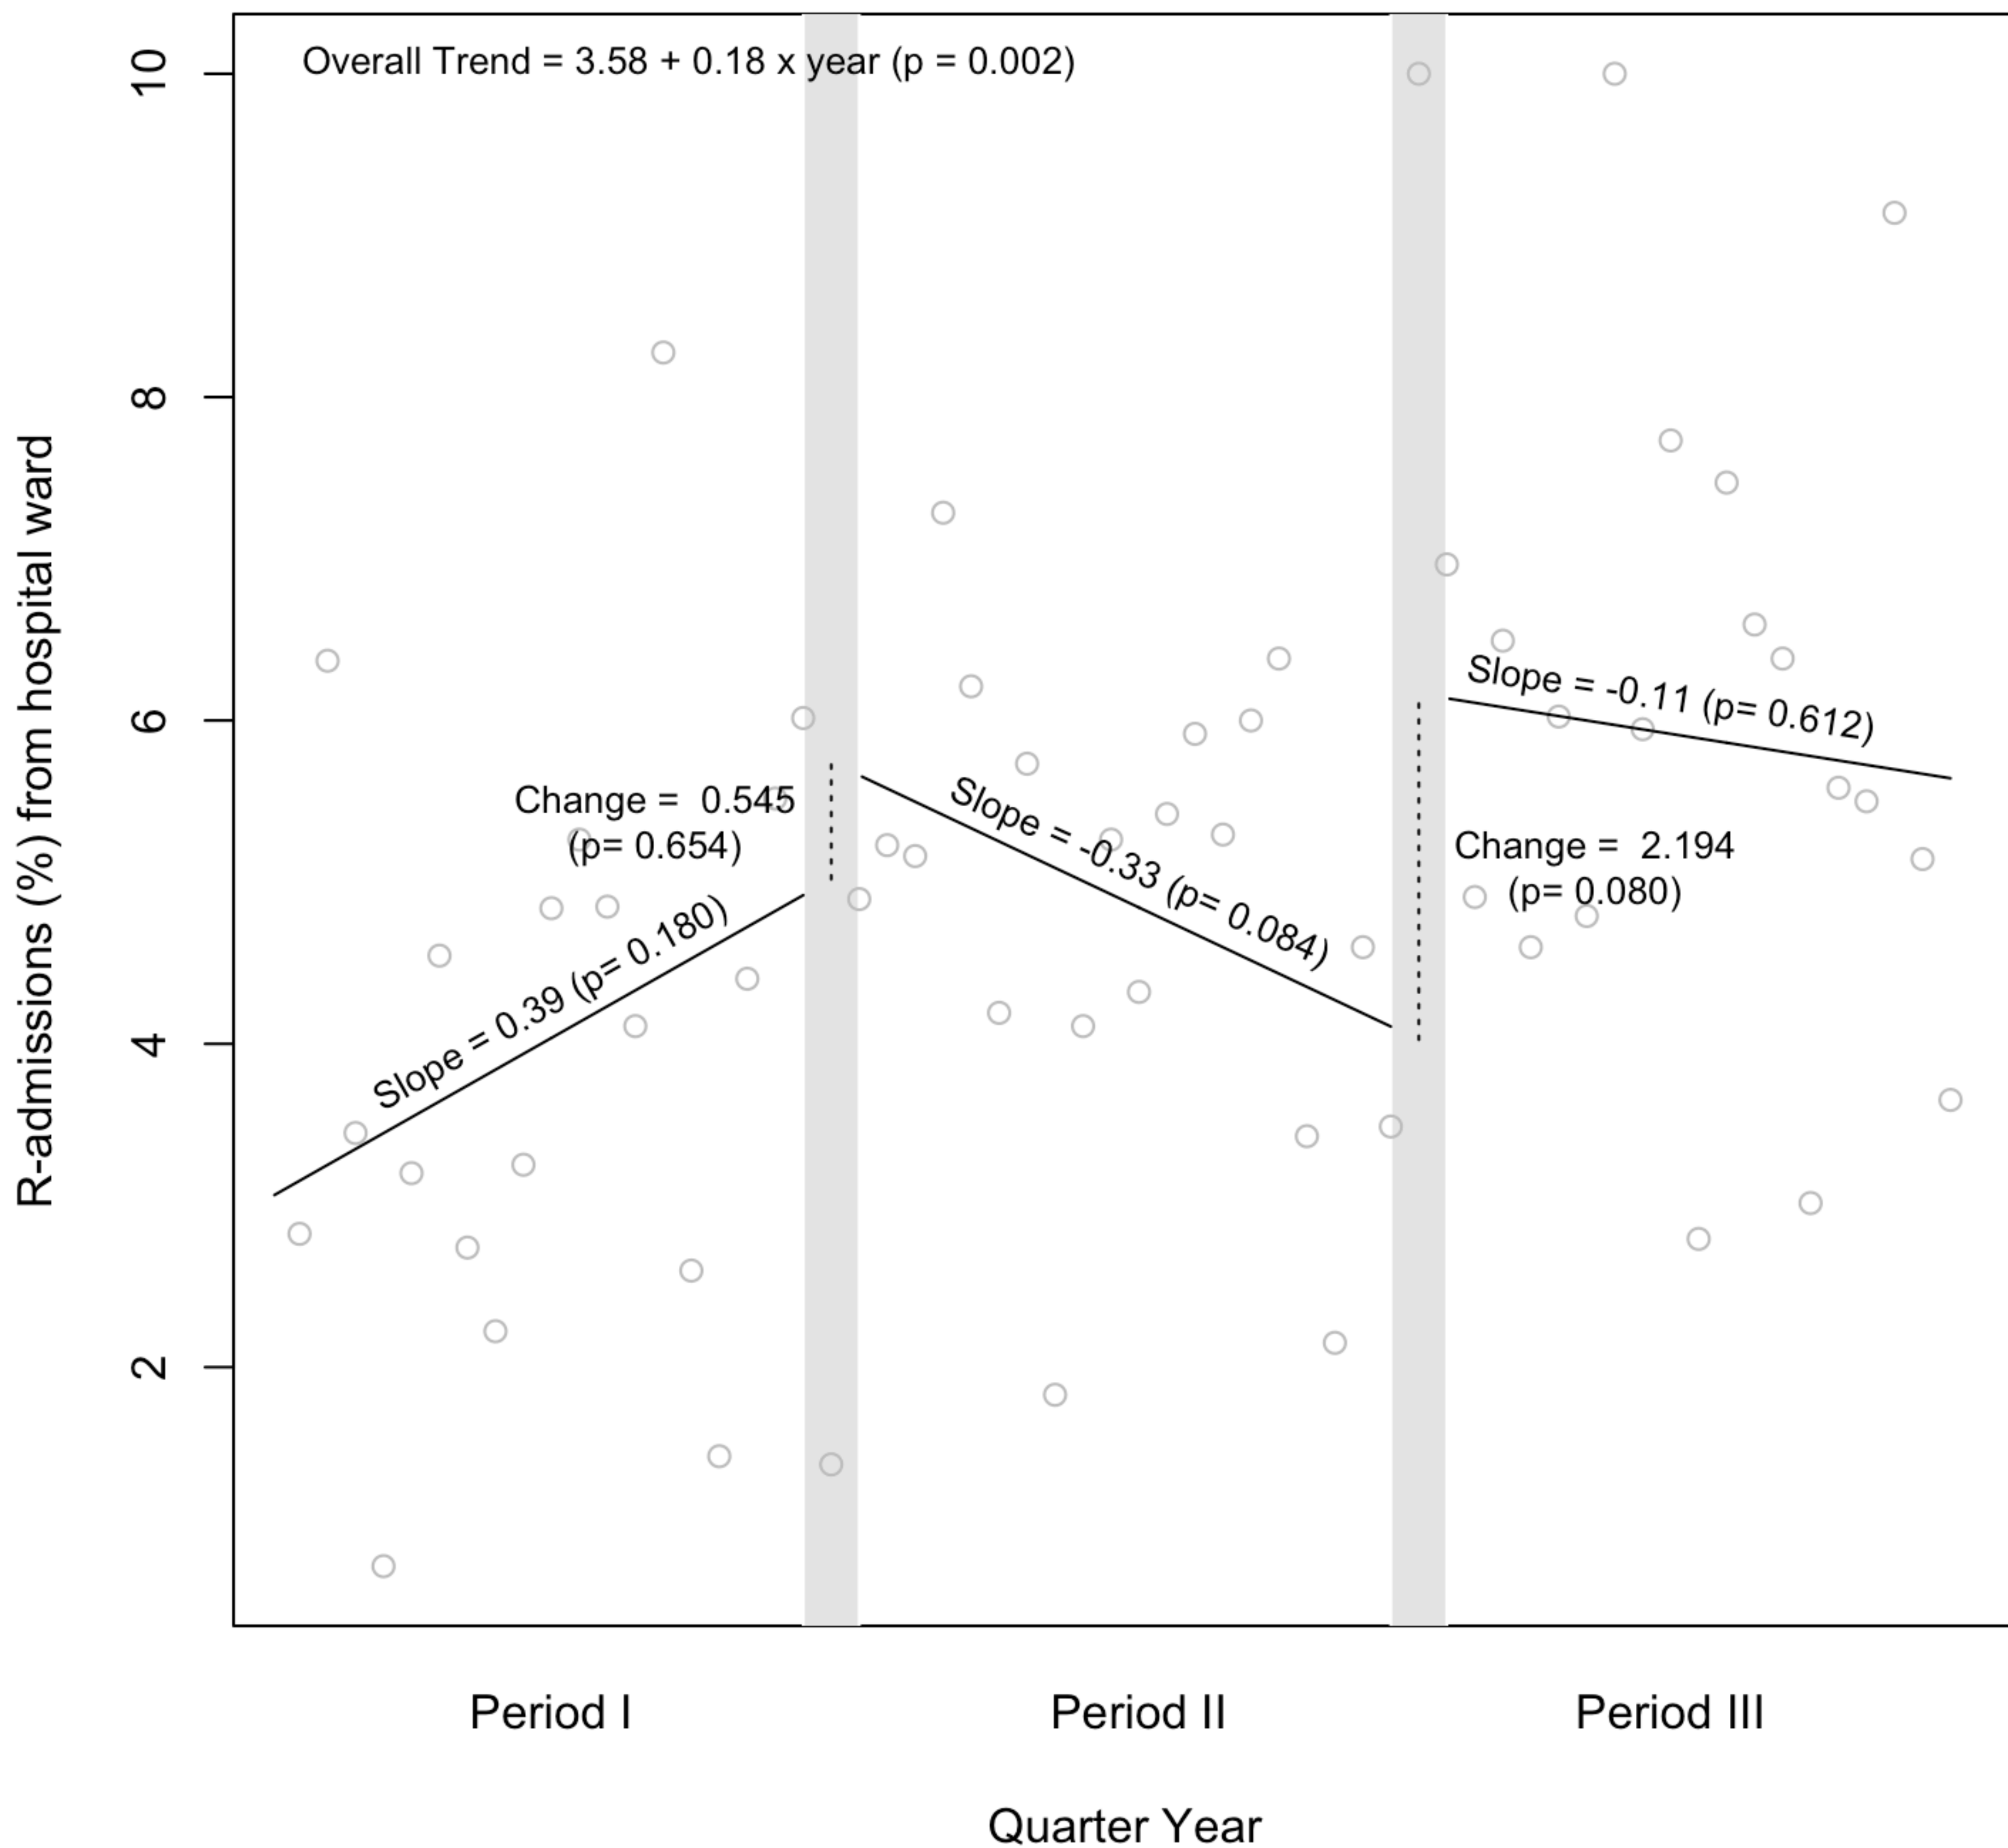

# Re-admissions from ICU (%)

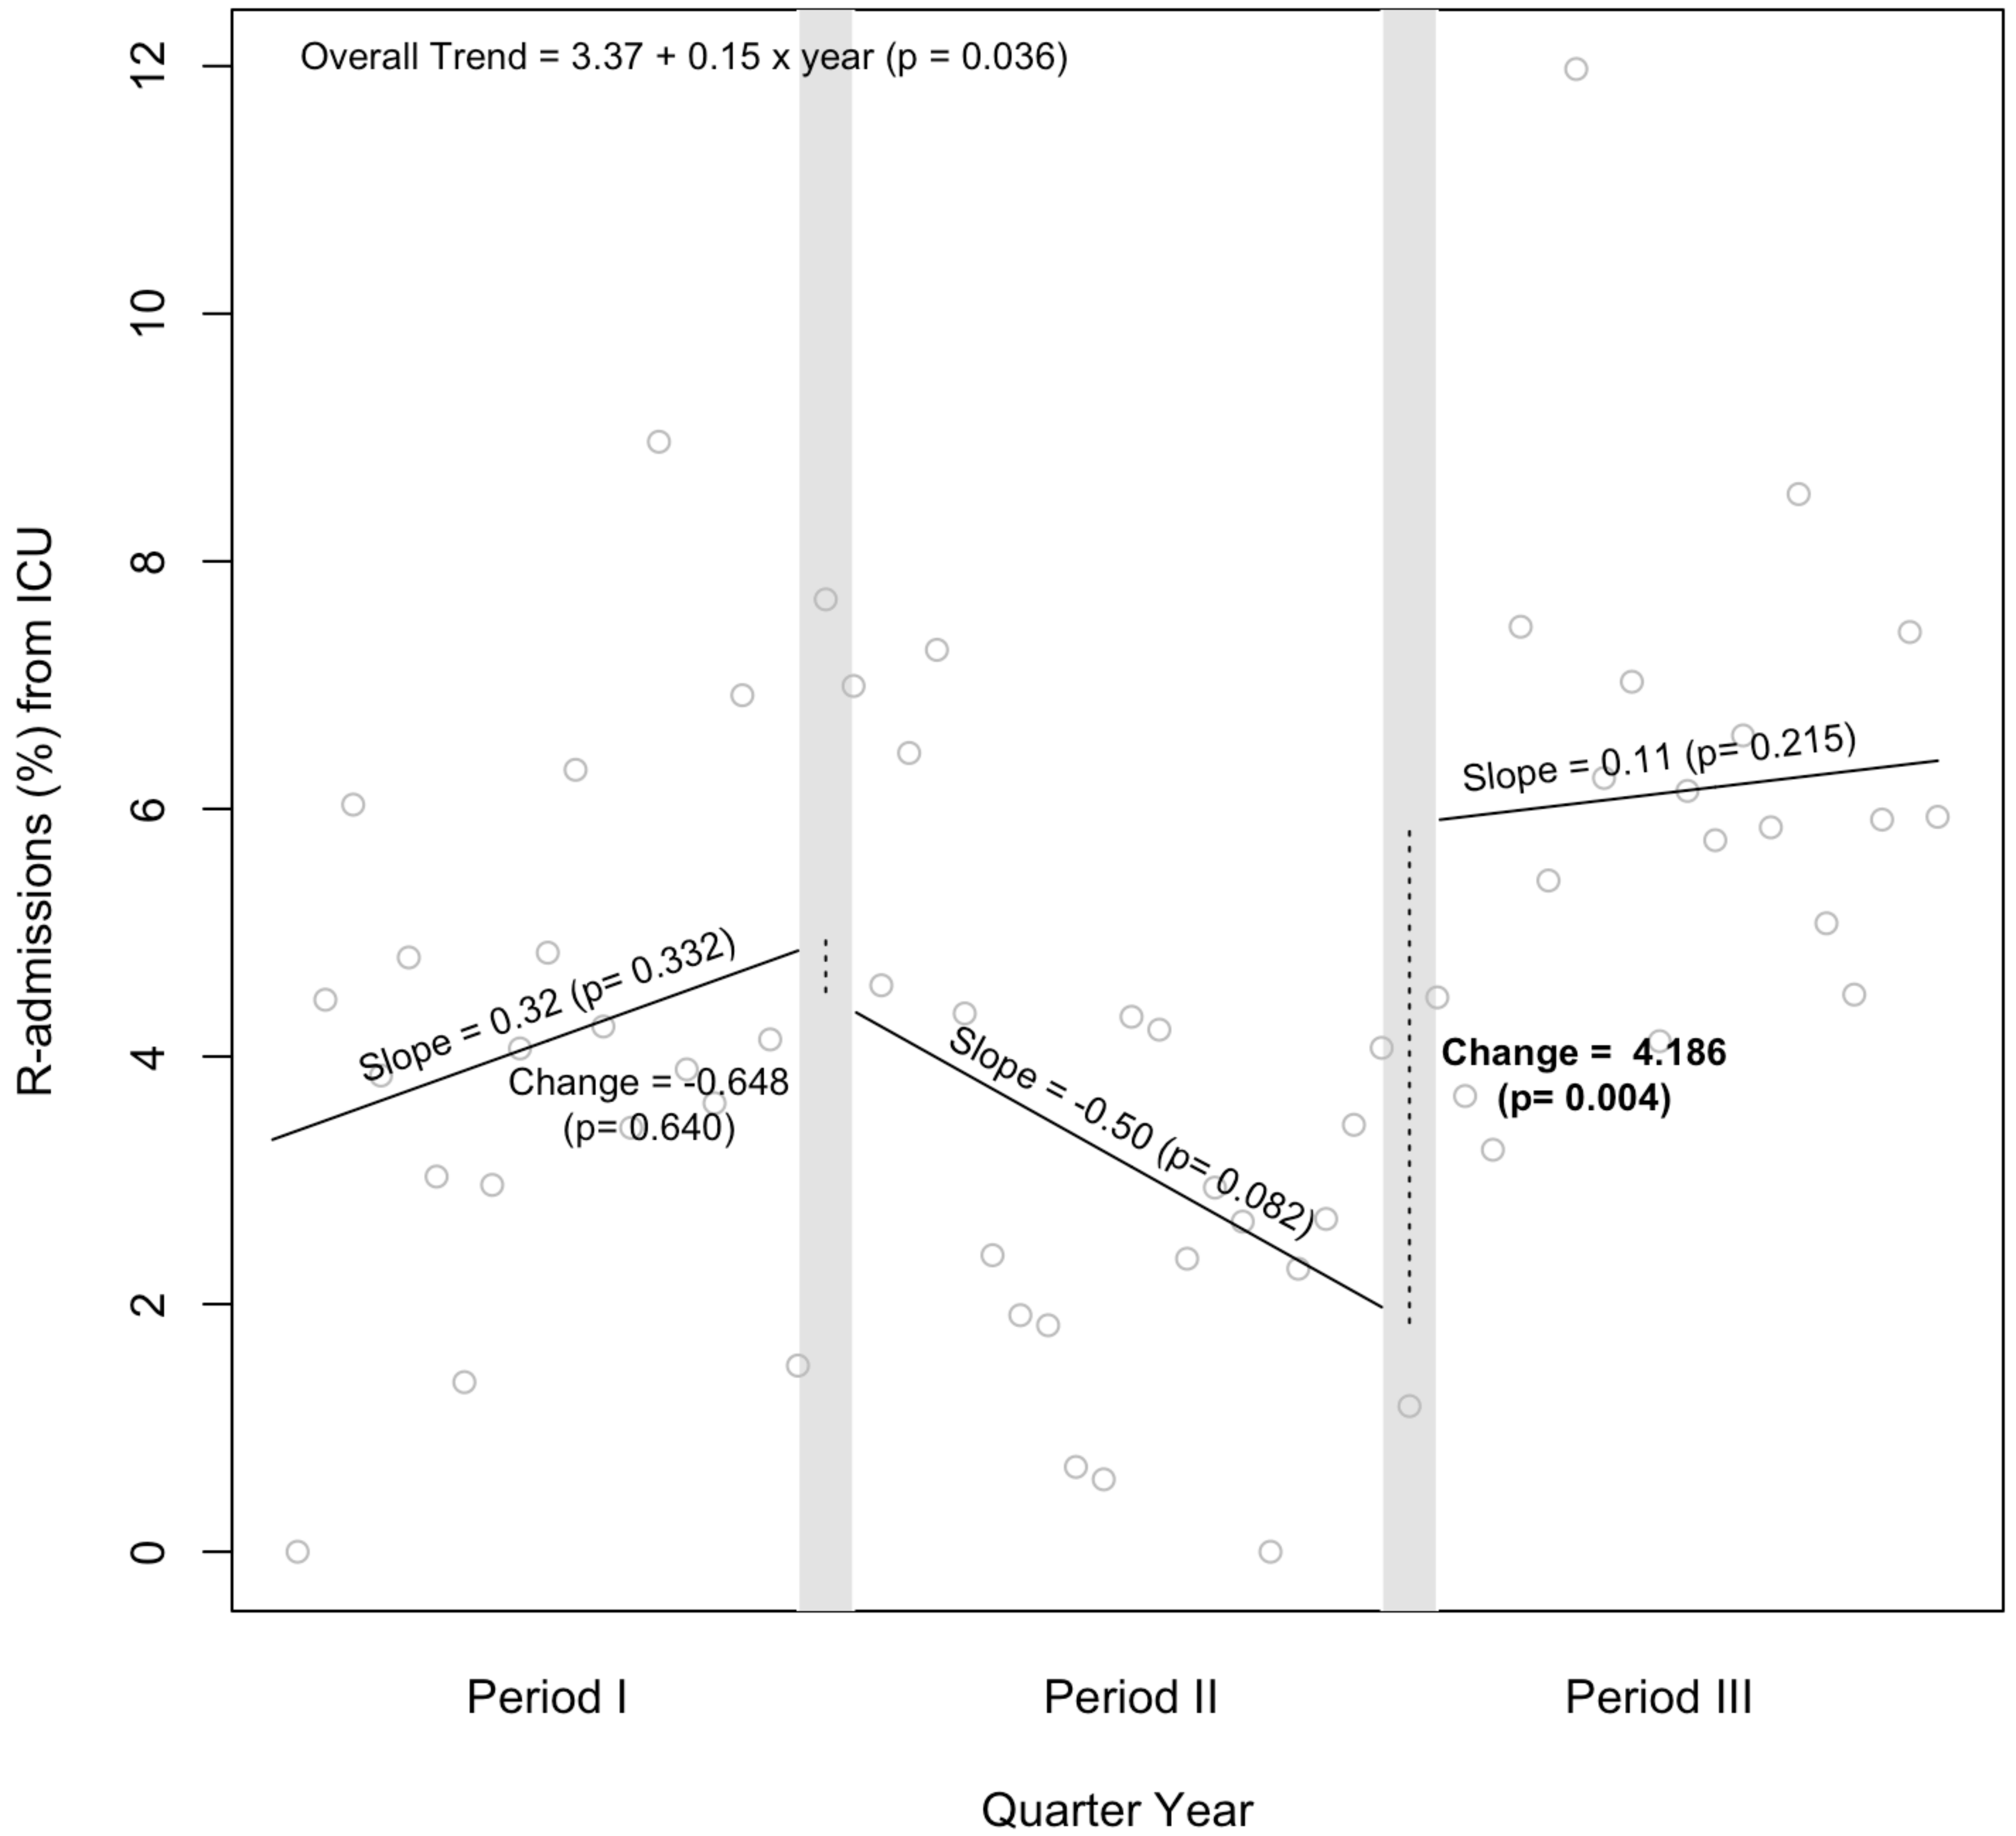

# Duration until re-admission from ward (in days)

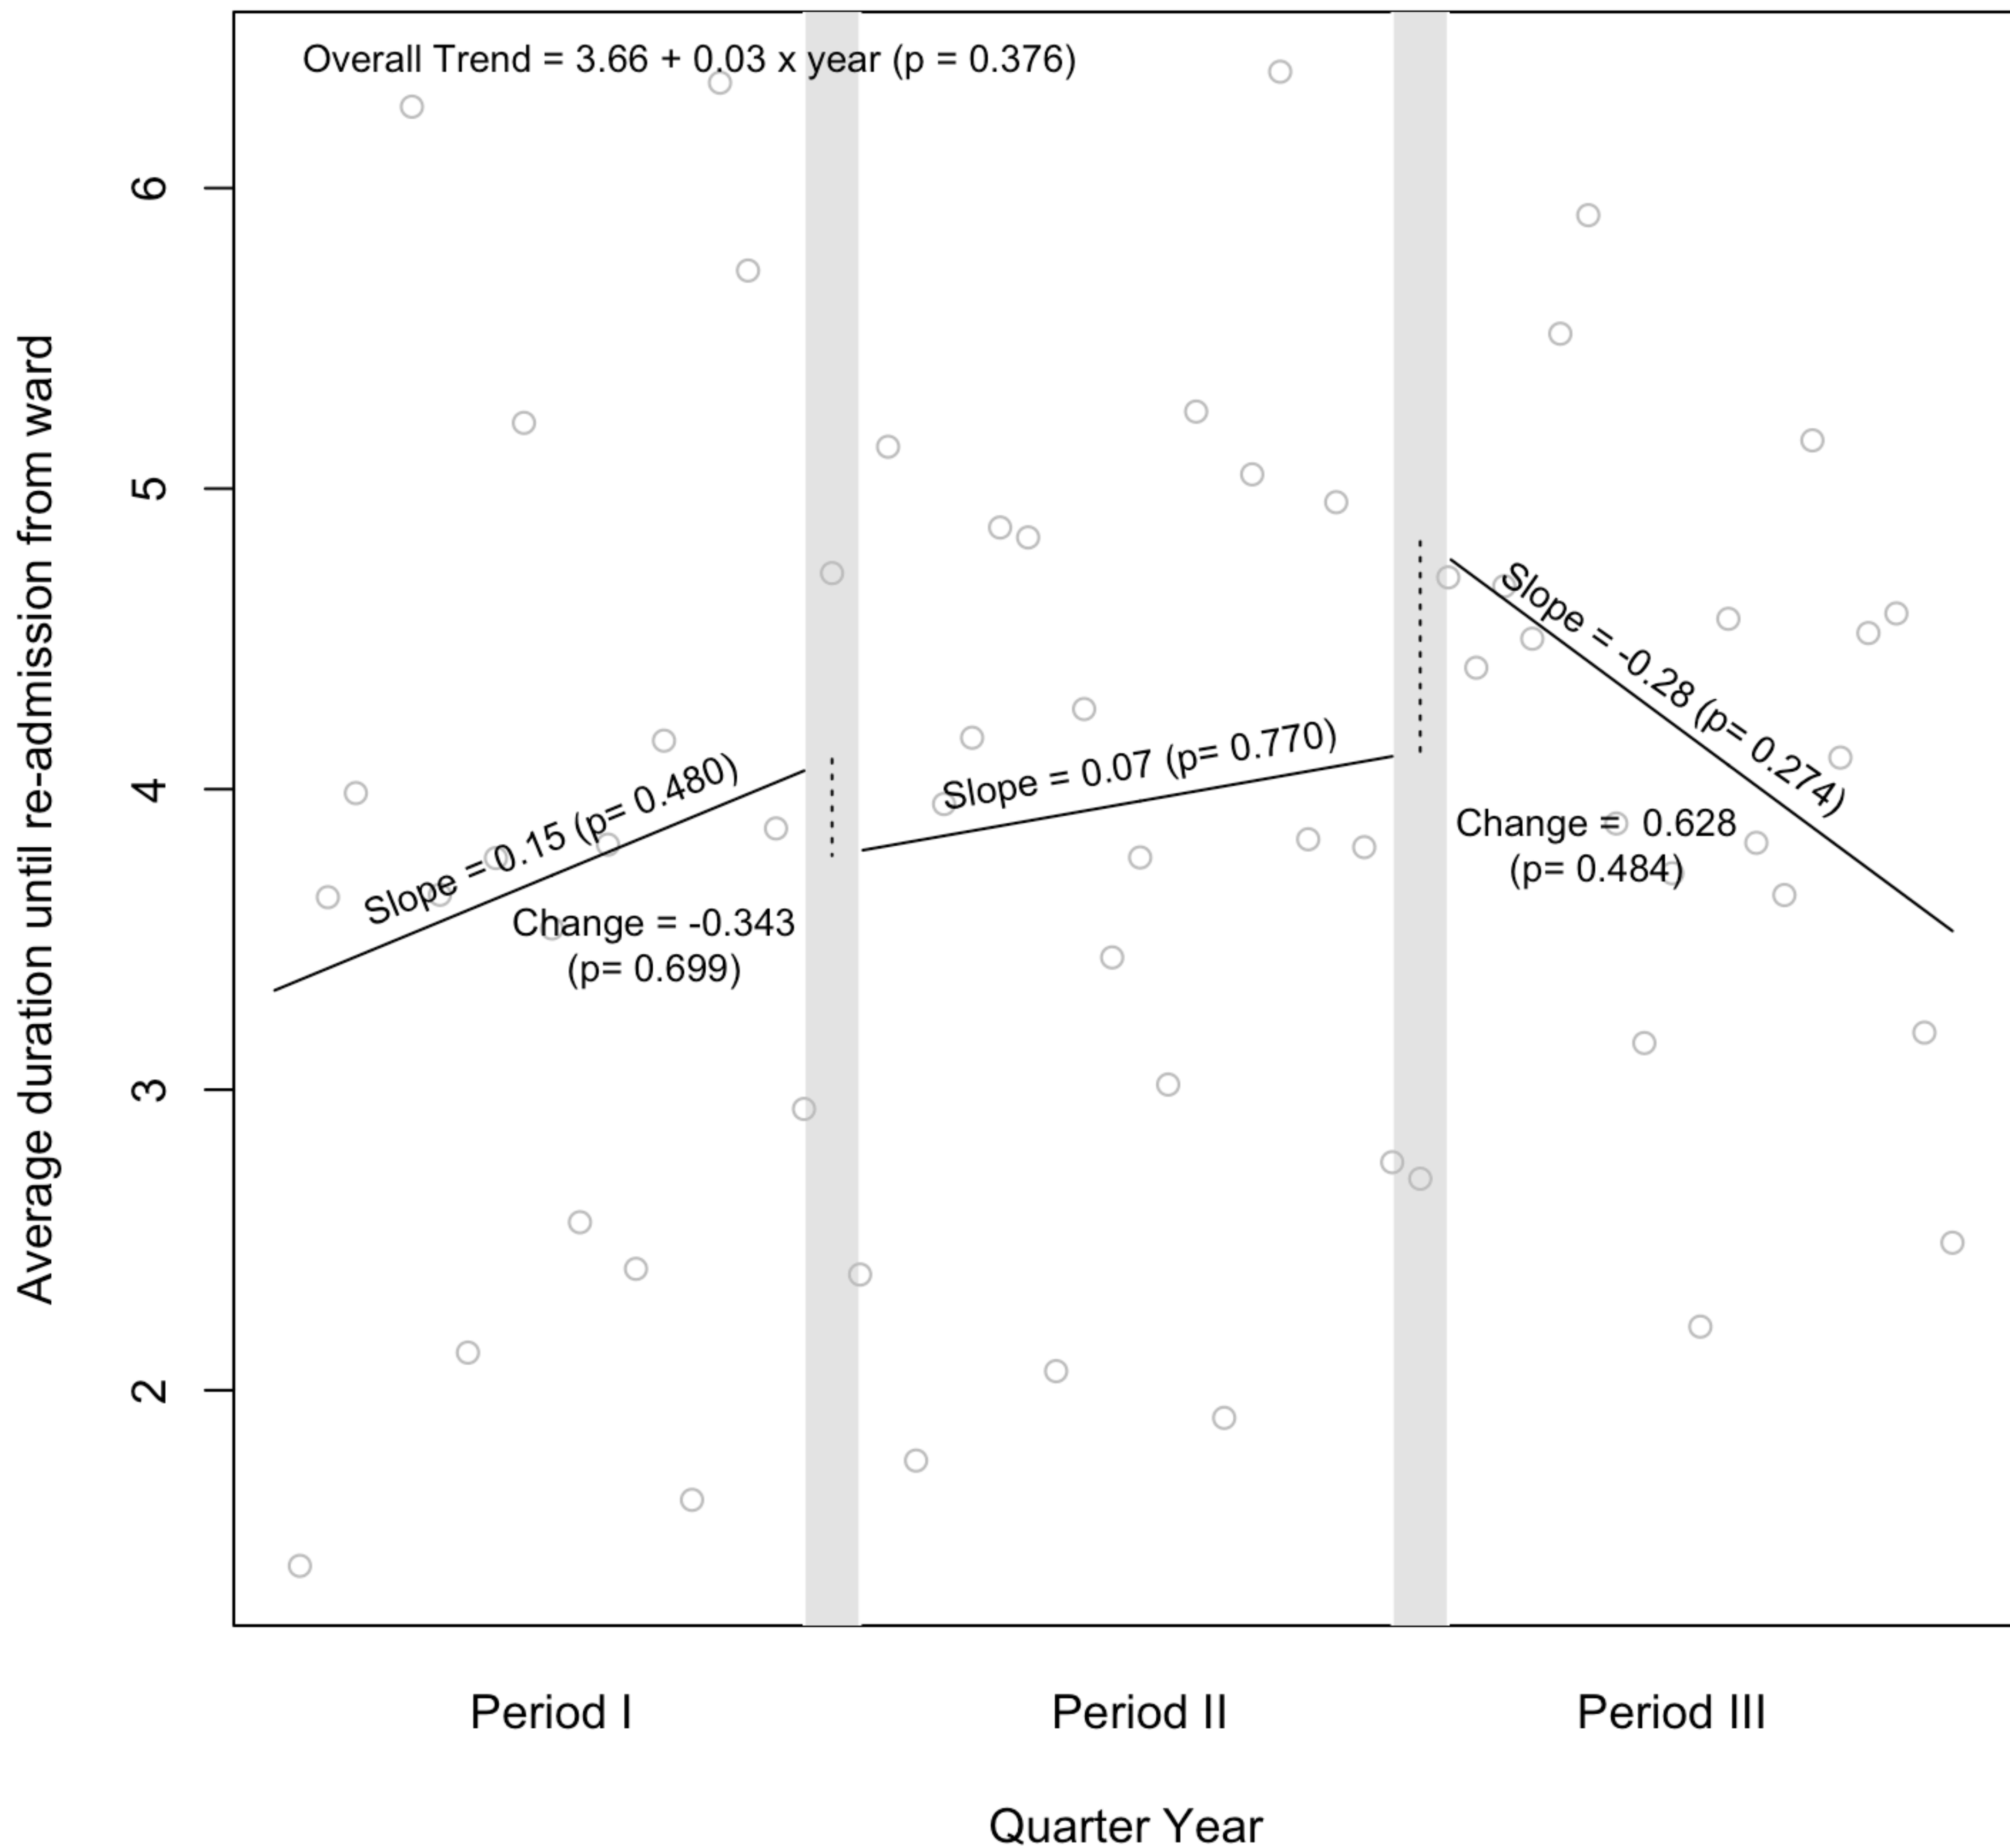

# Duration until re-admission from ICU (in days)

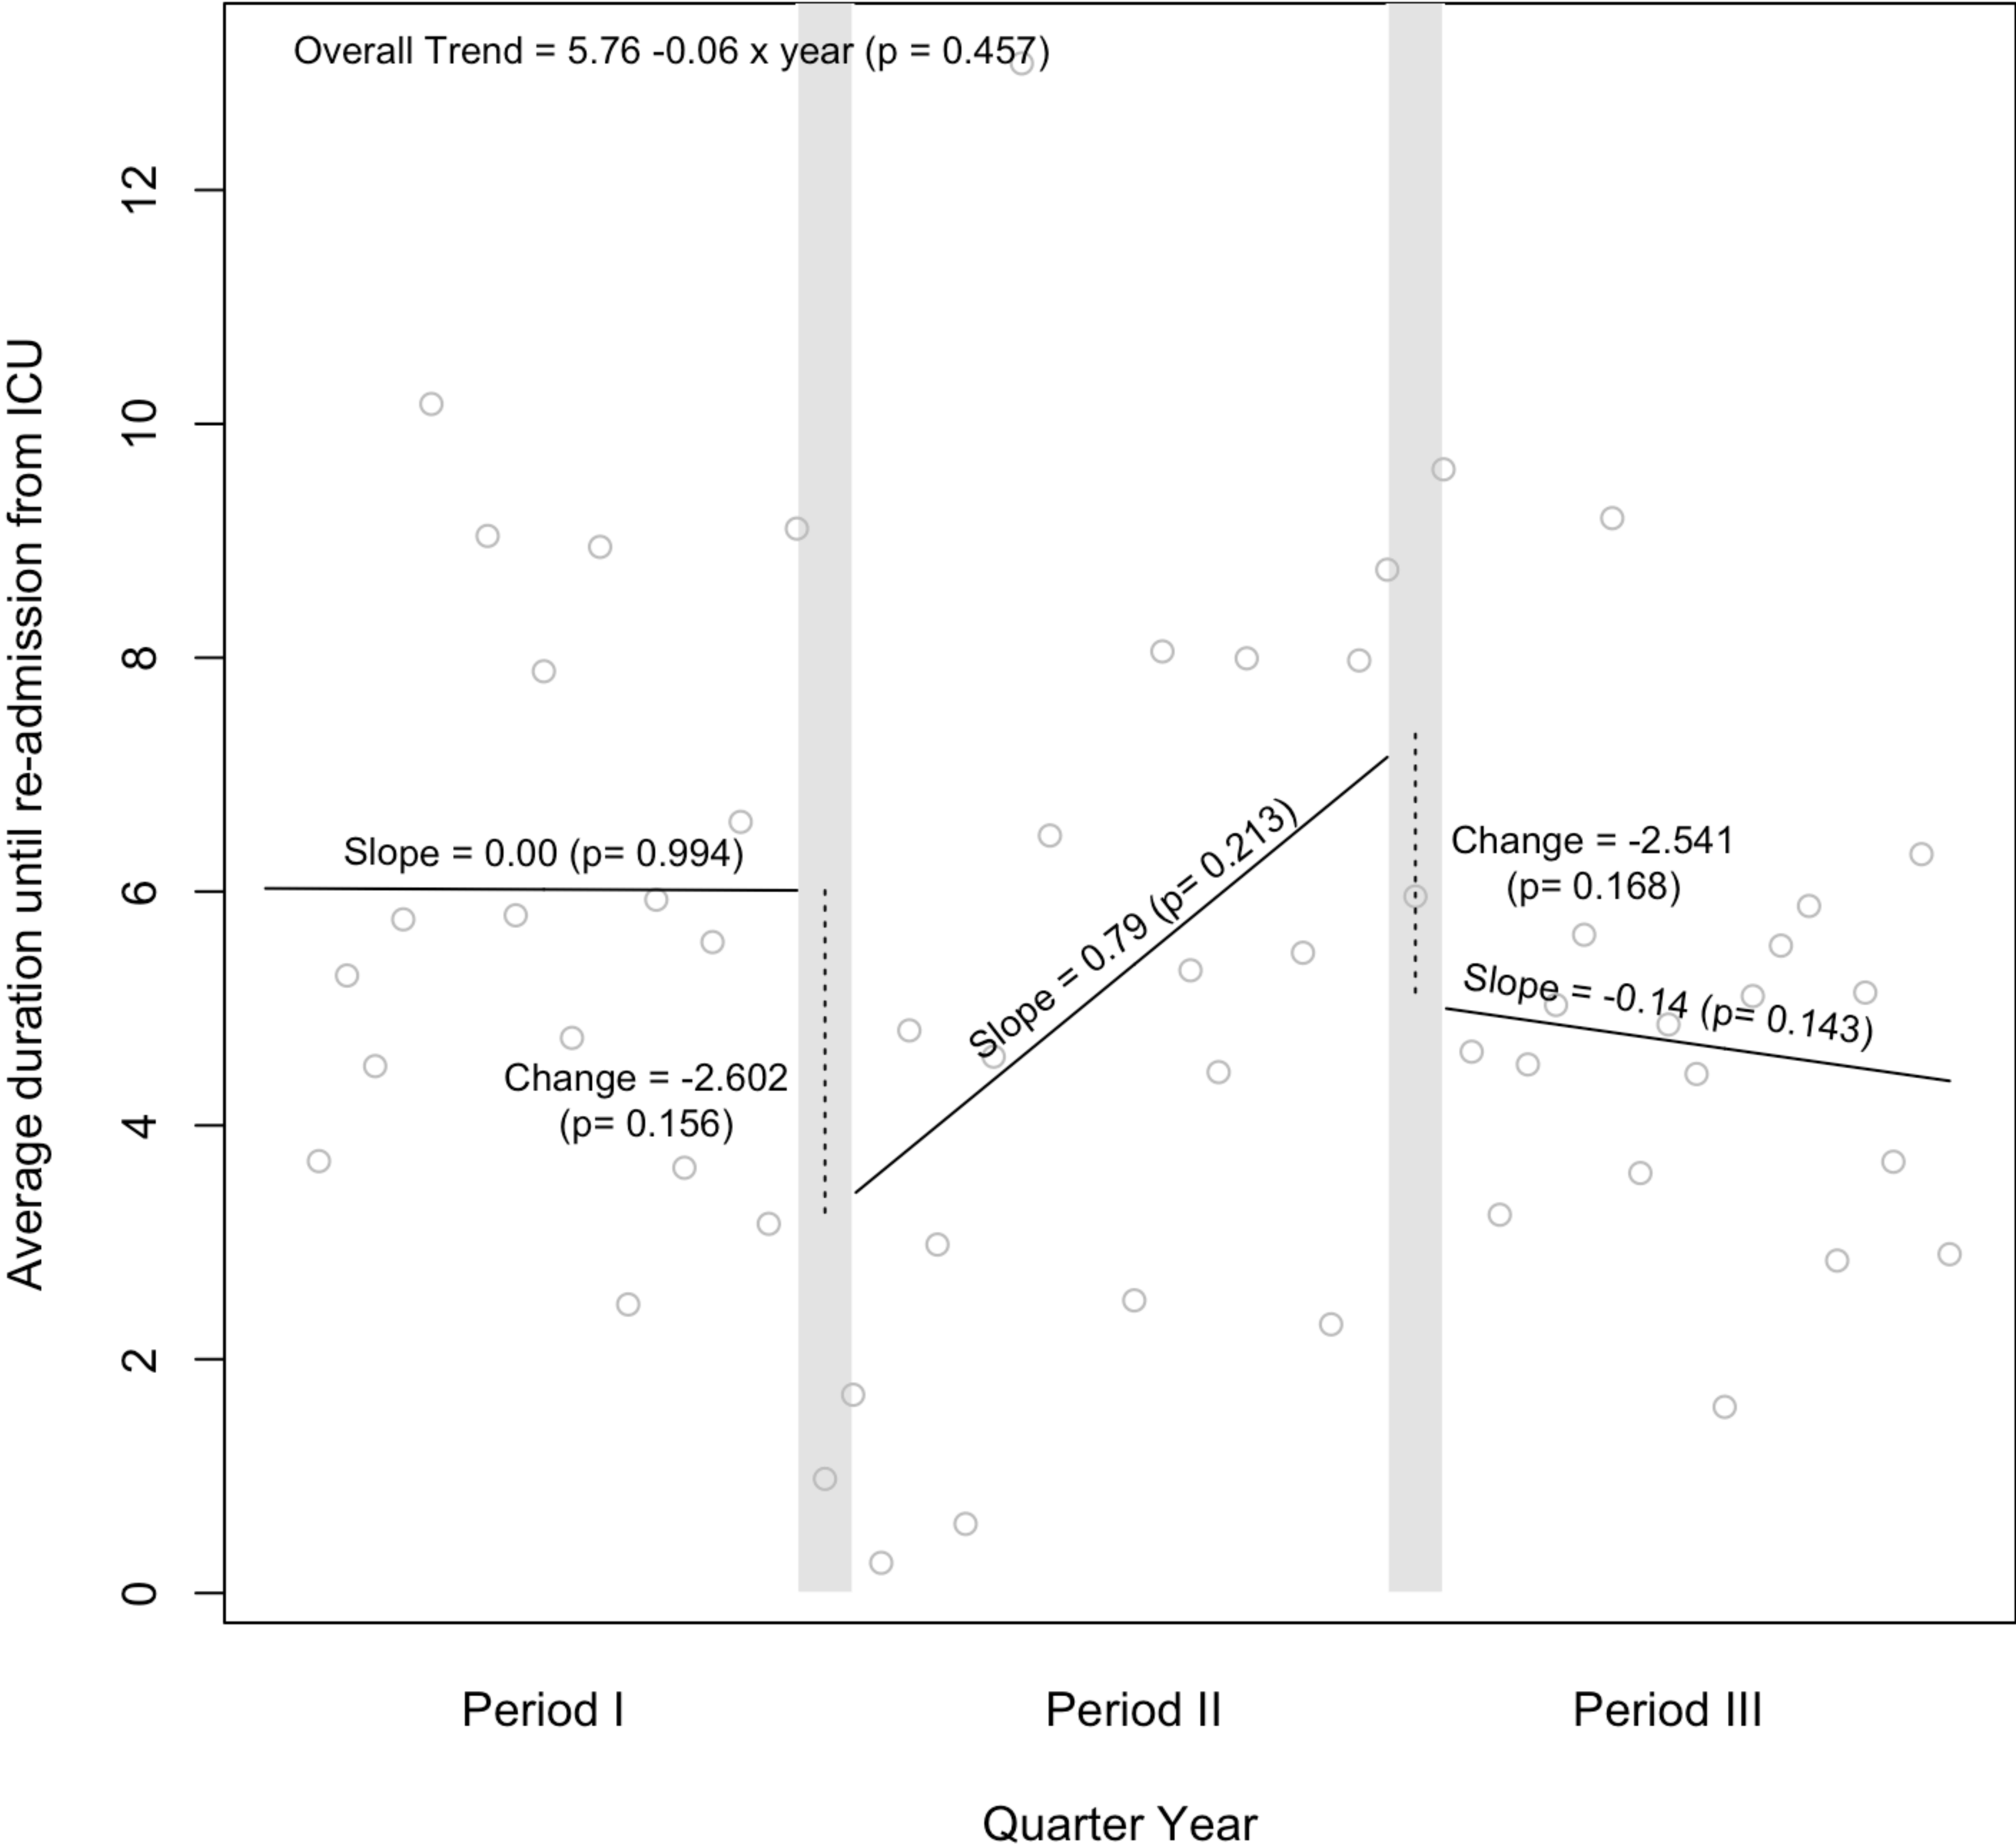

# Overtriaged from the ICU (<24h to ward)

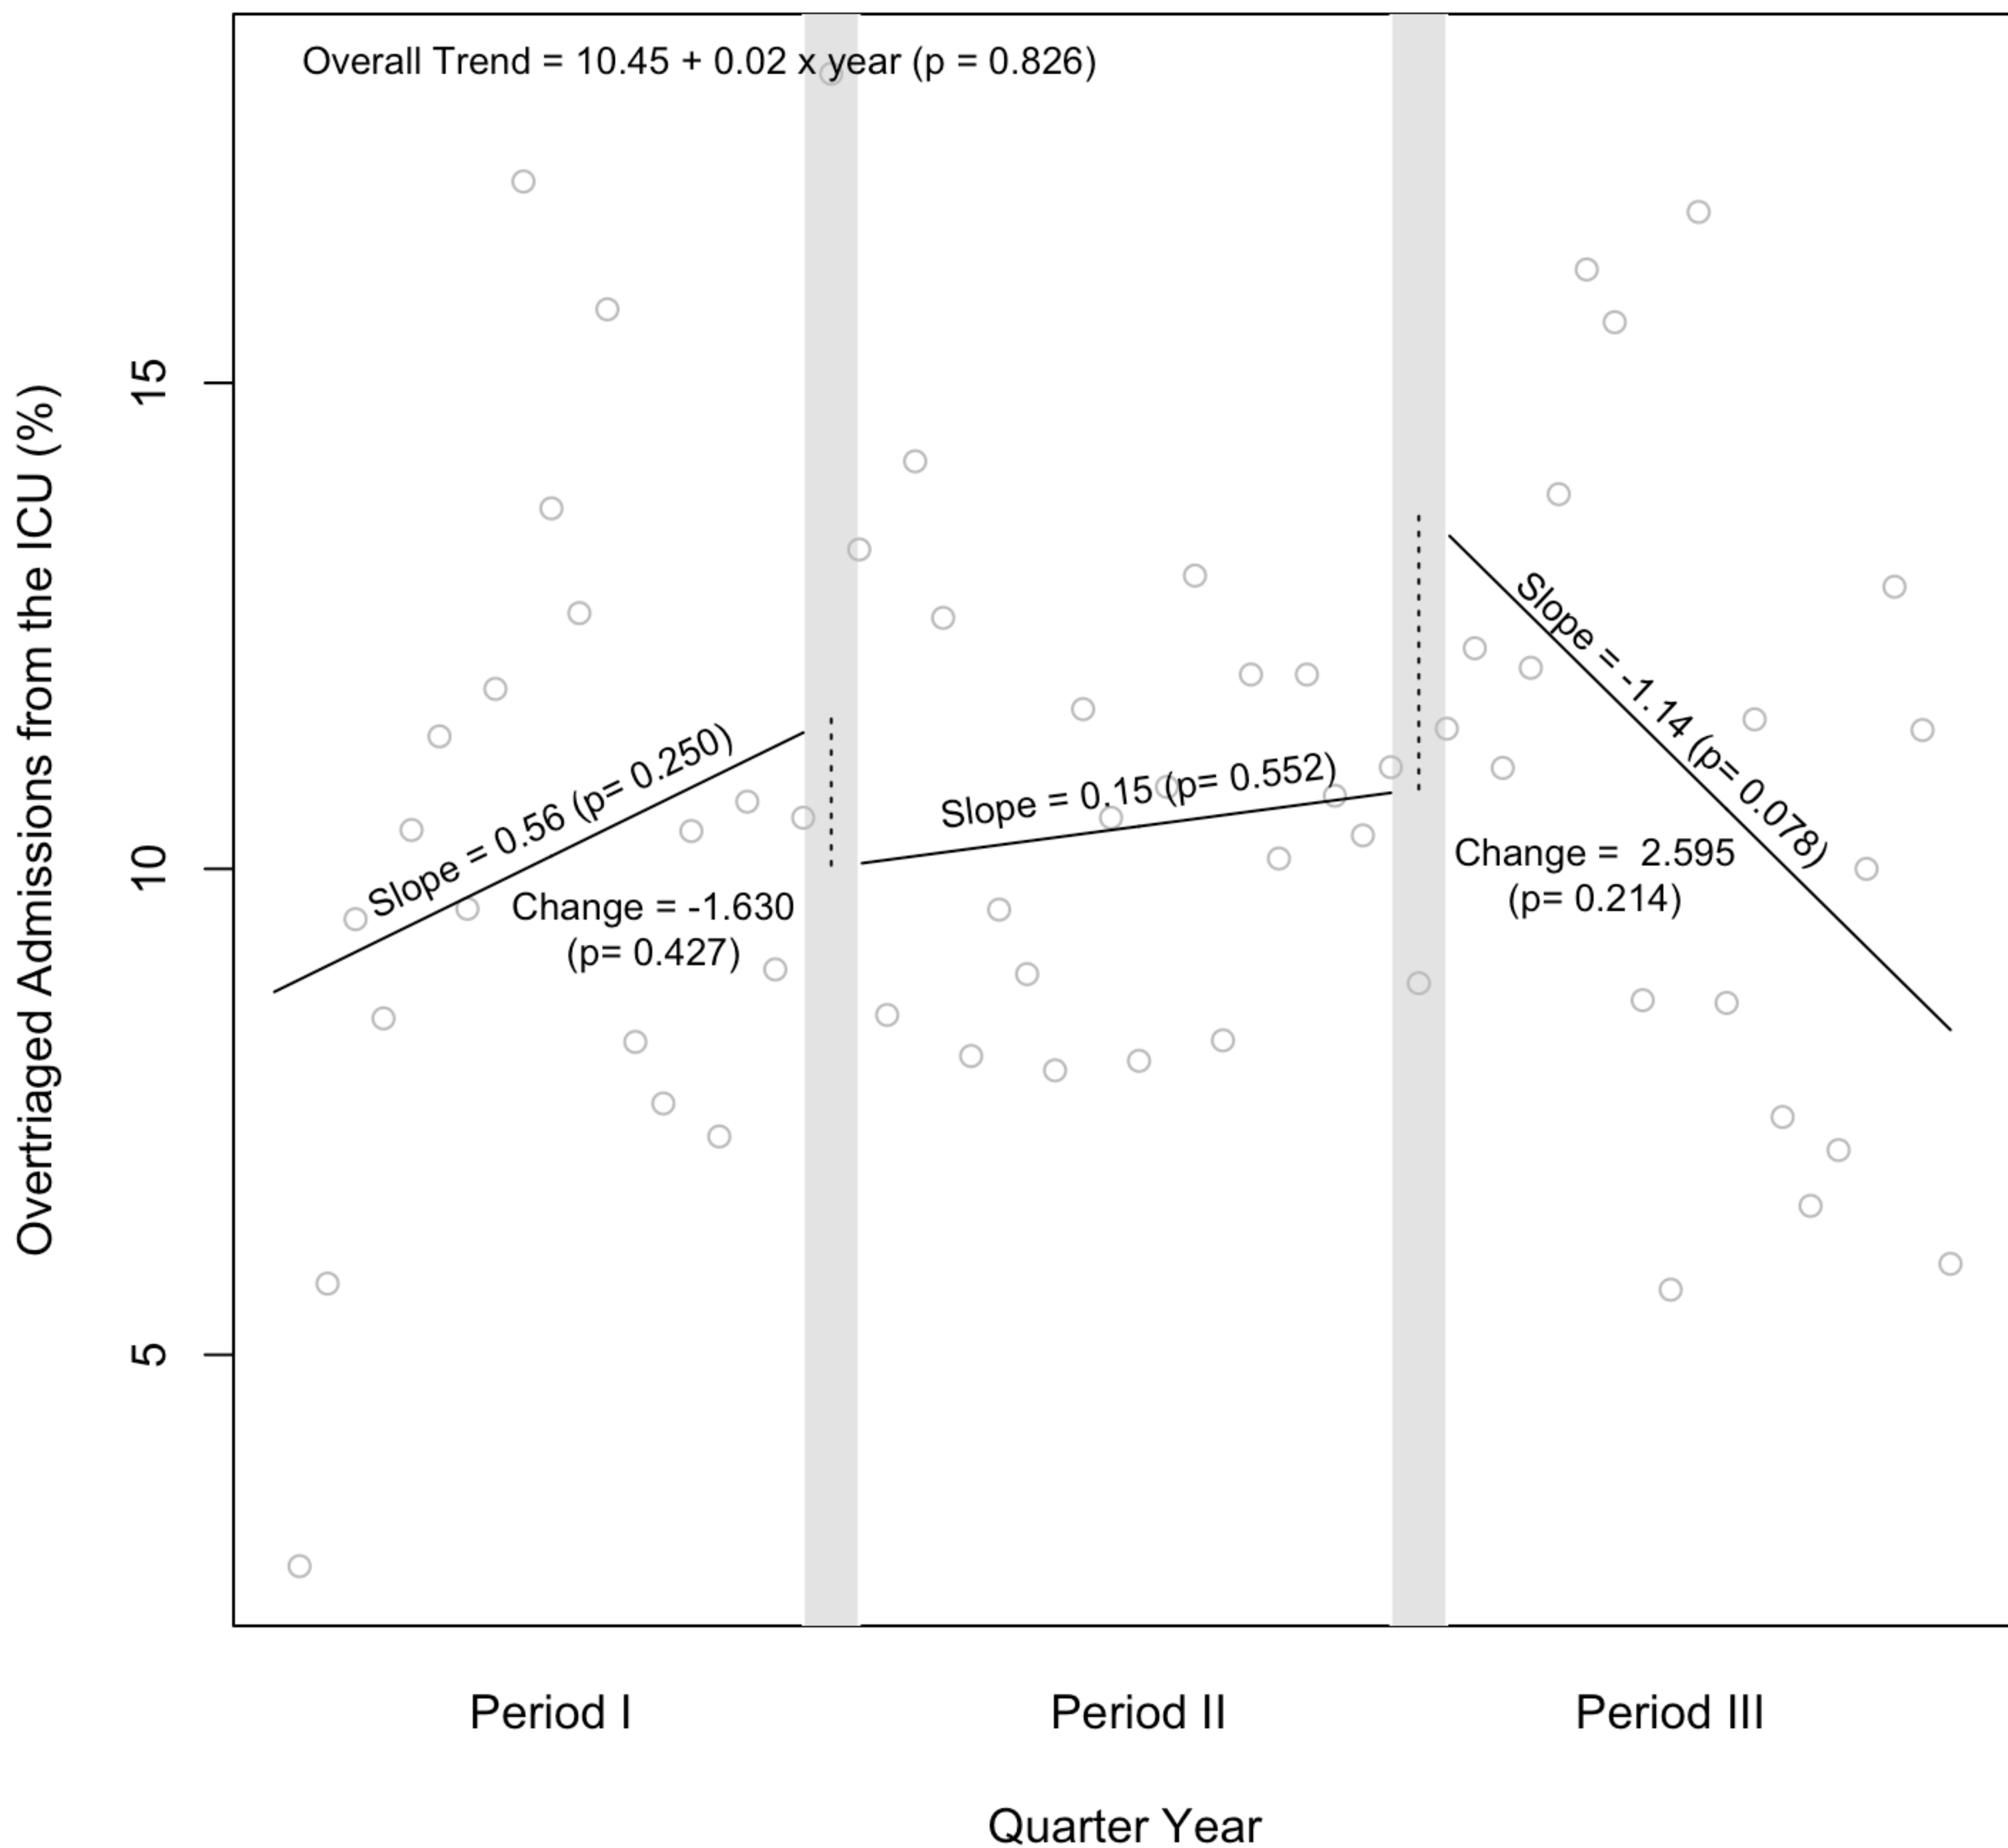



# Overtriage from the recovery (<24h to ward)

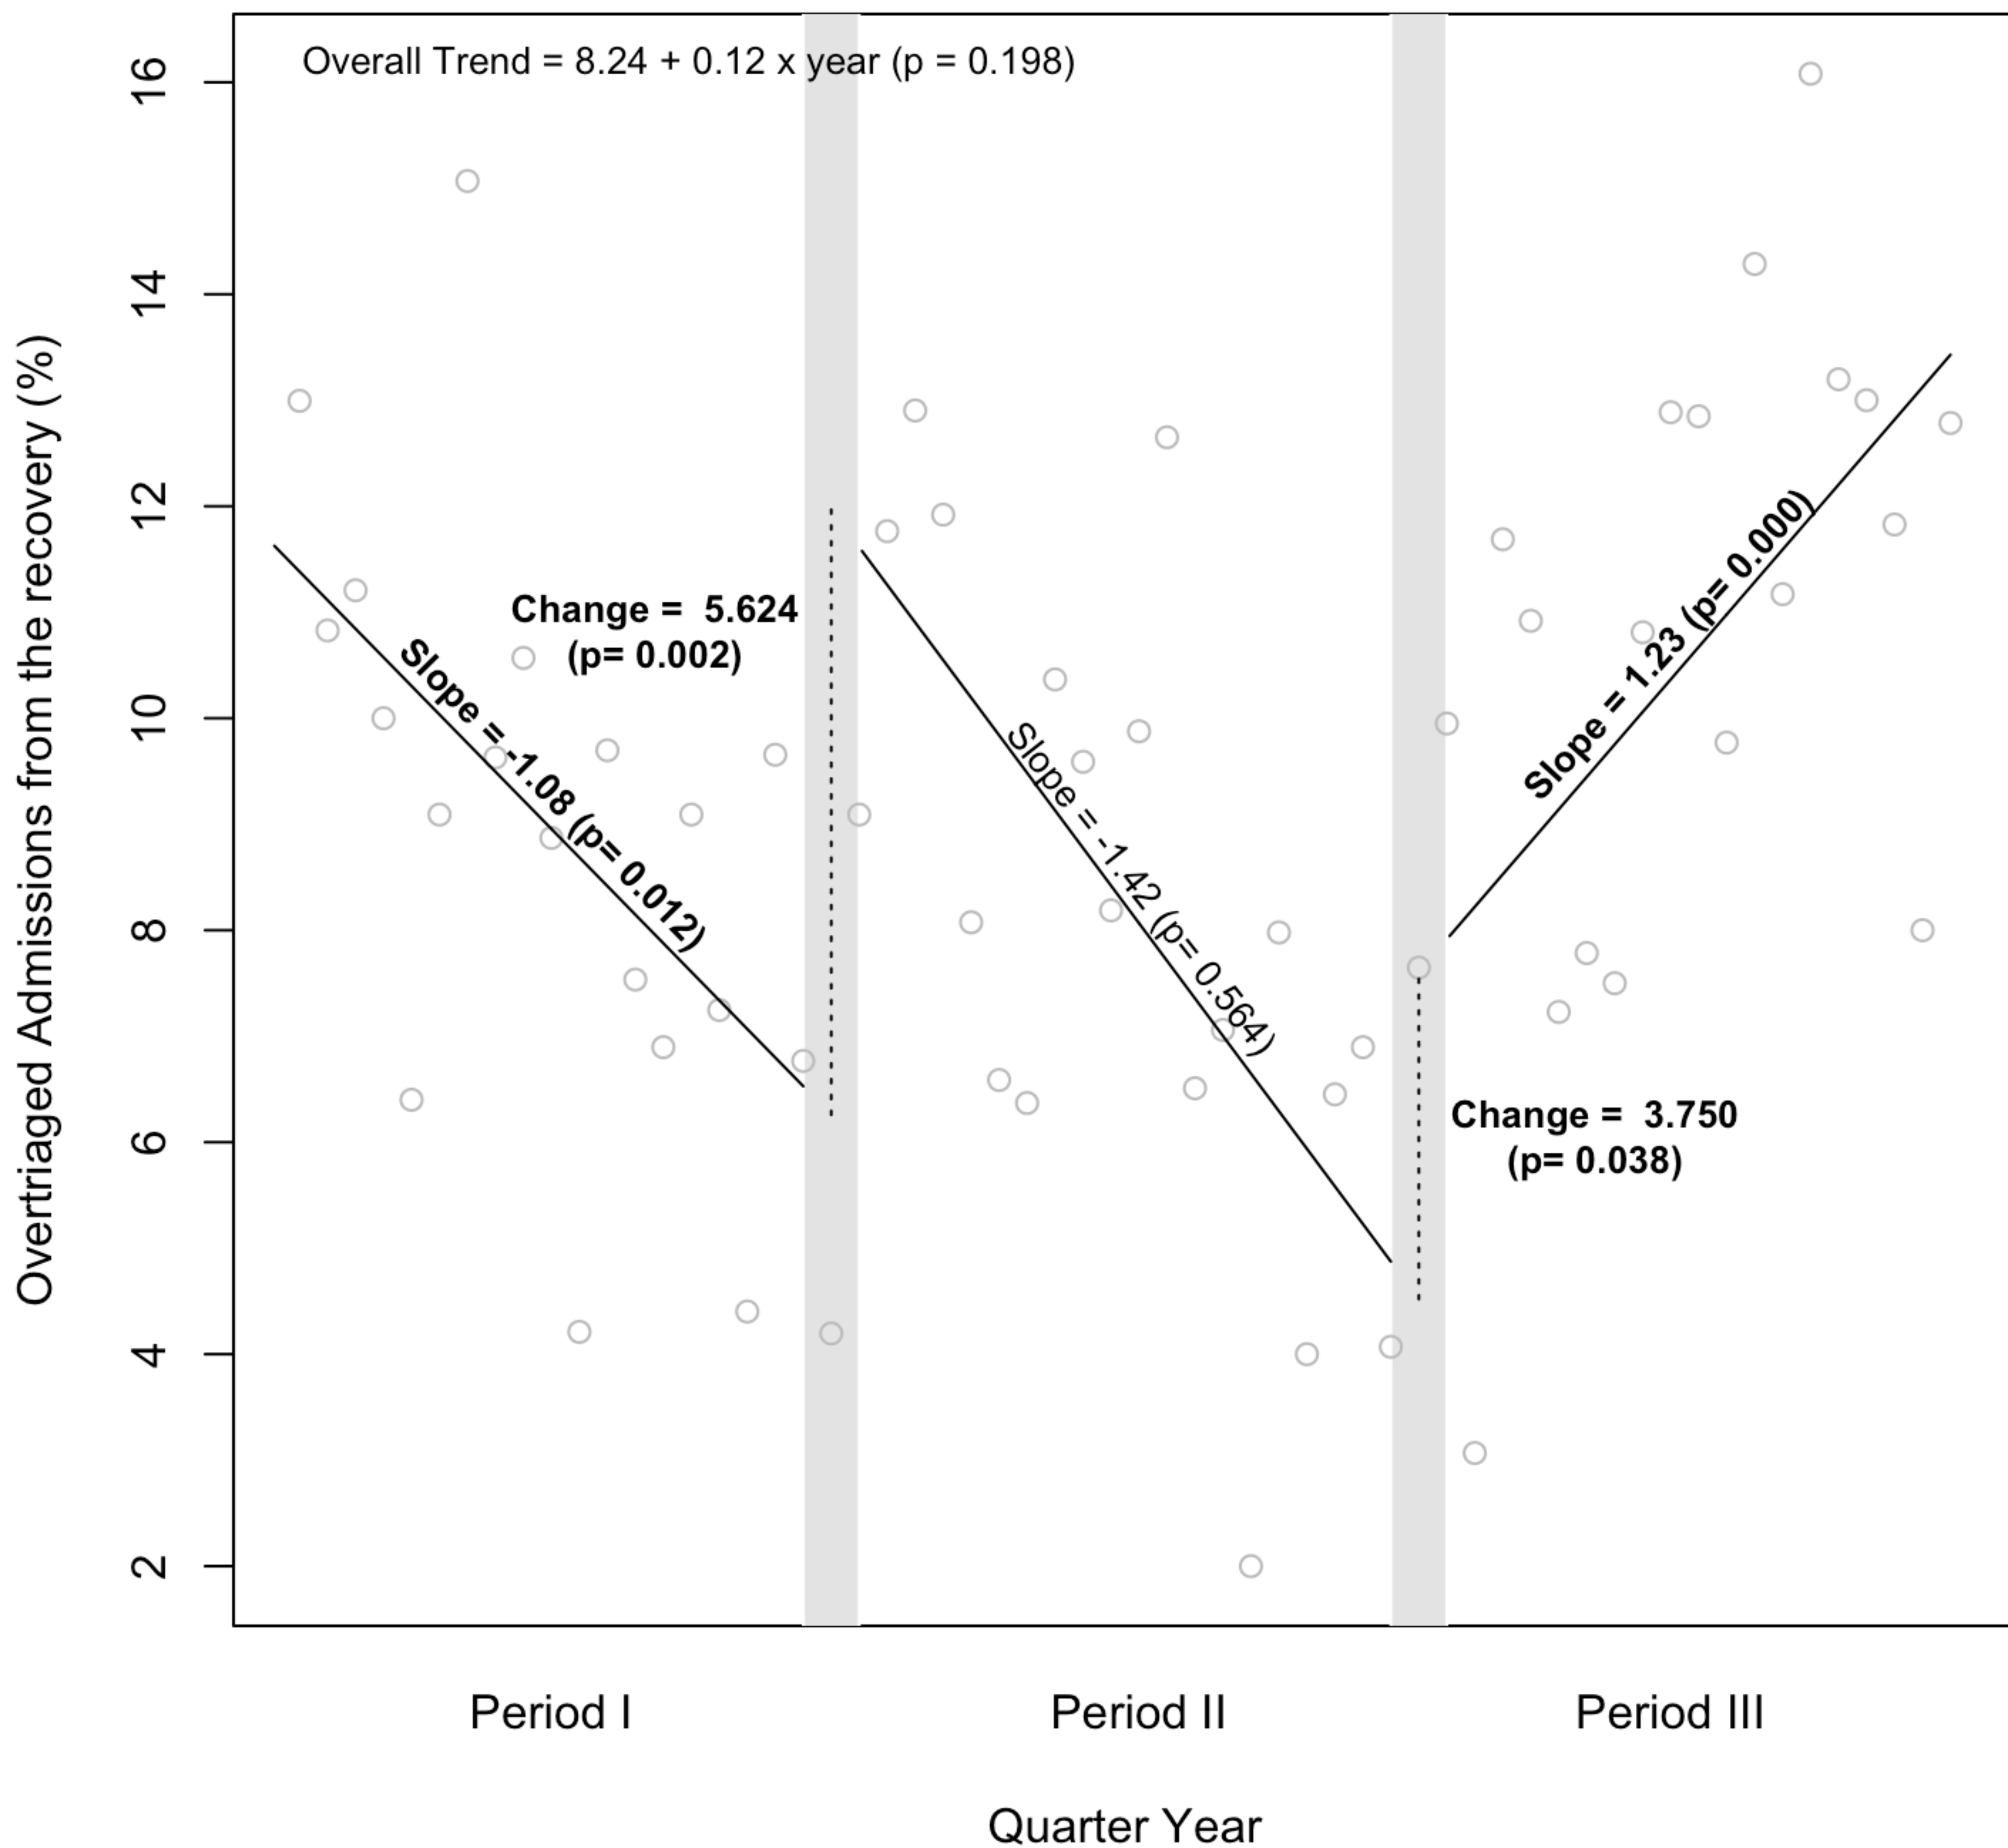

# Transfer to ICU <24h (%)

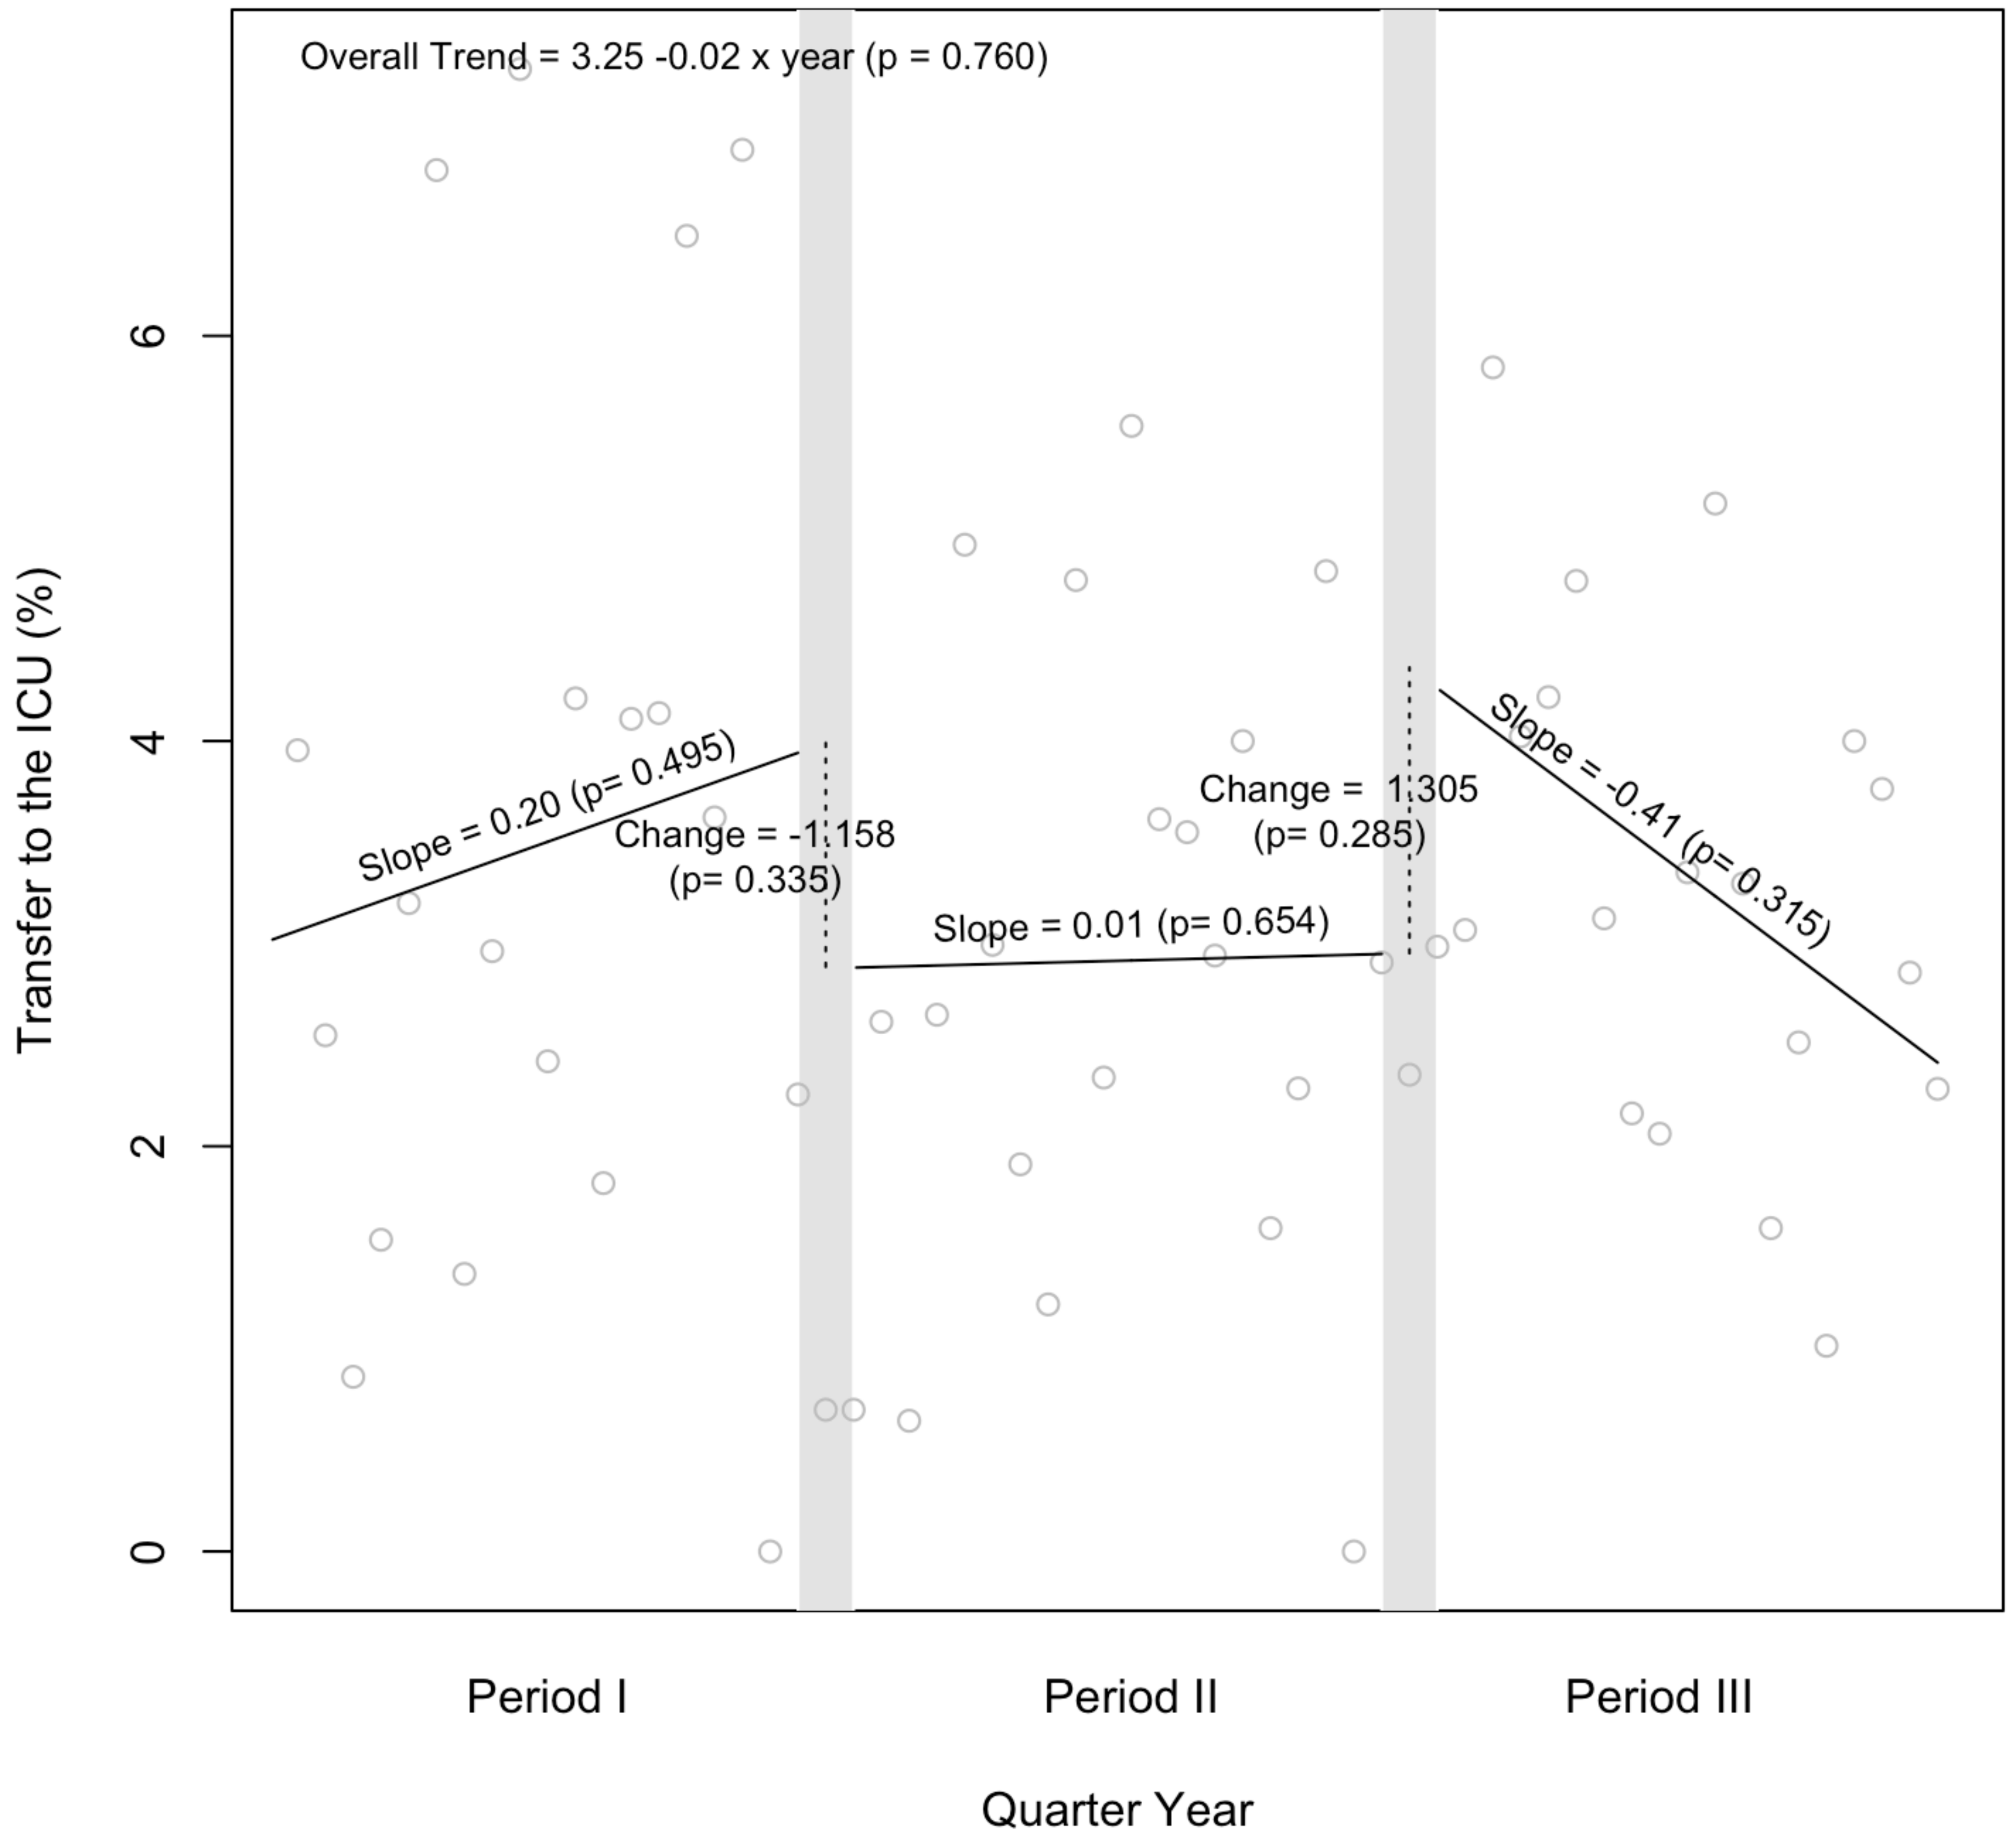

# Re-admission <24h from ward (%)

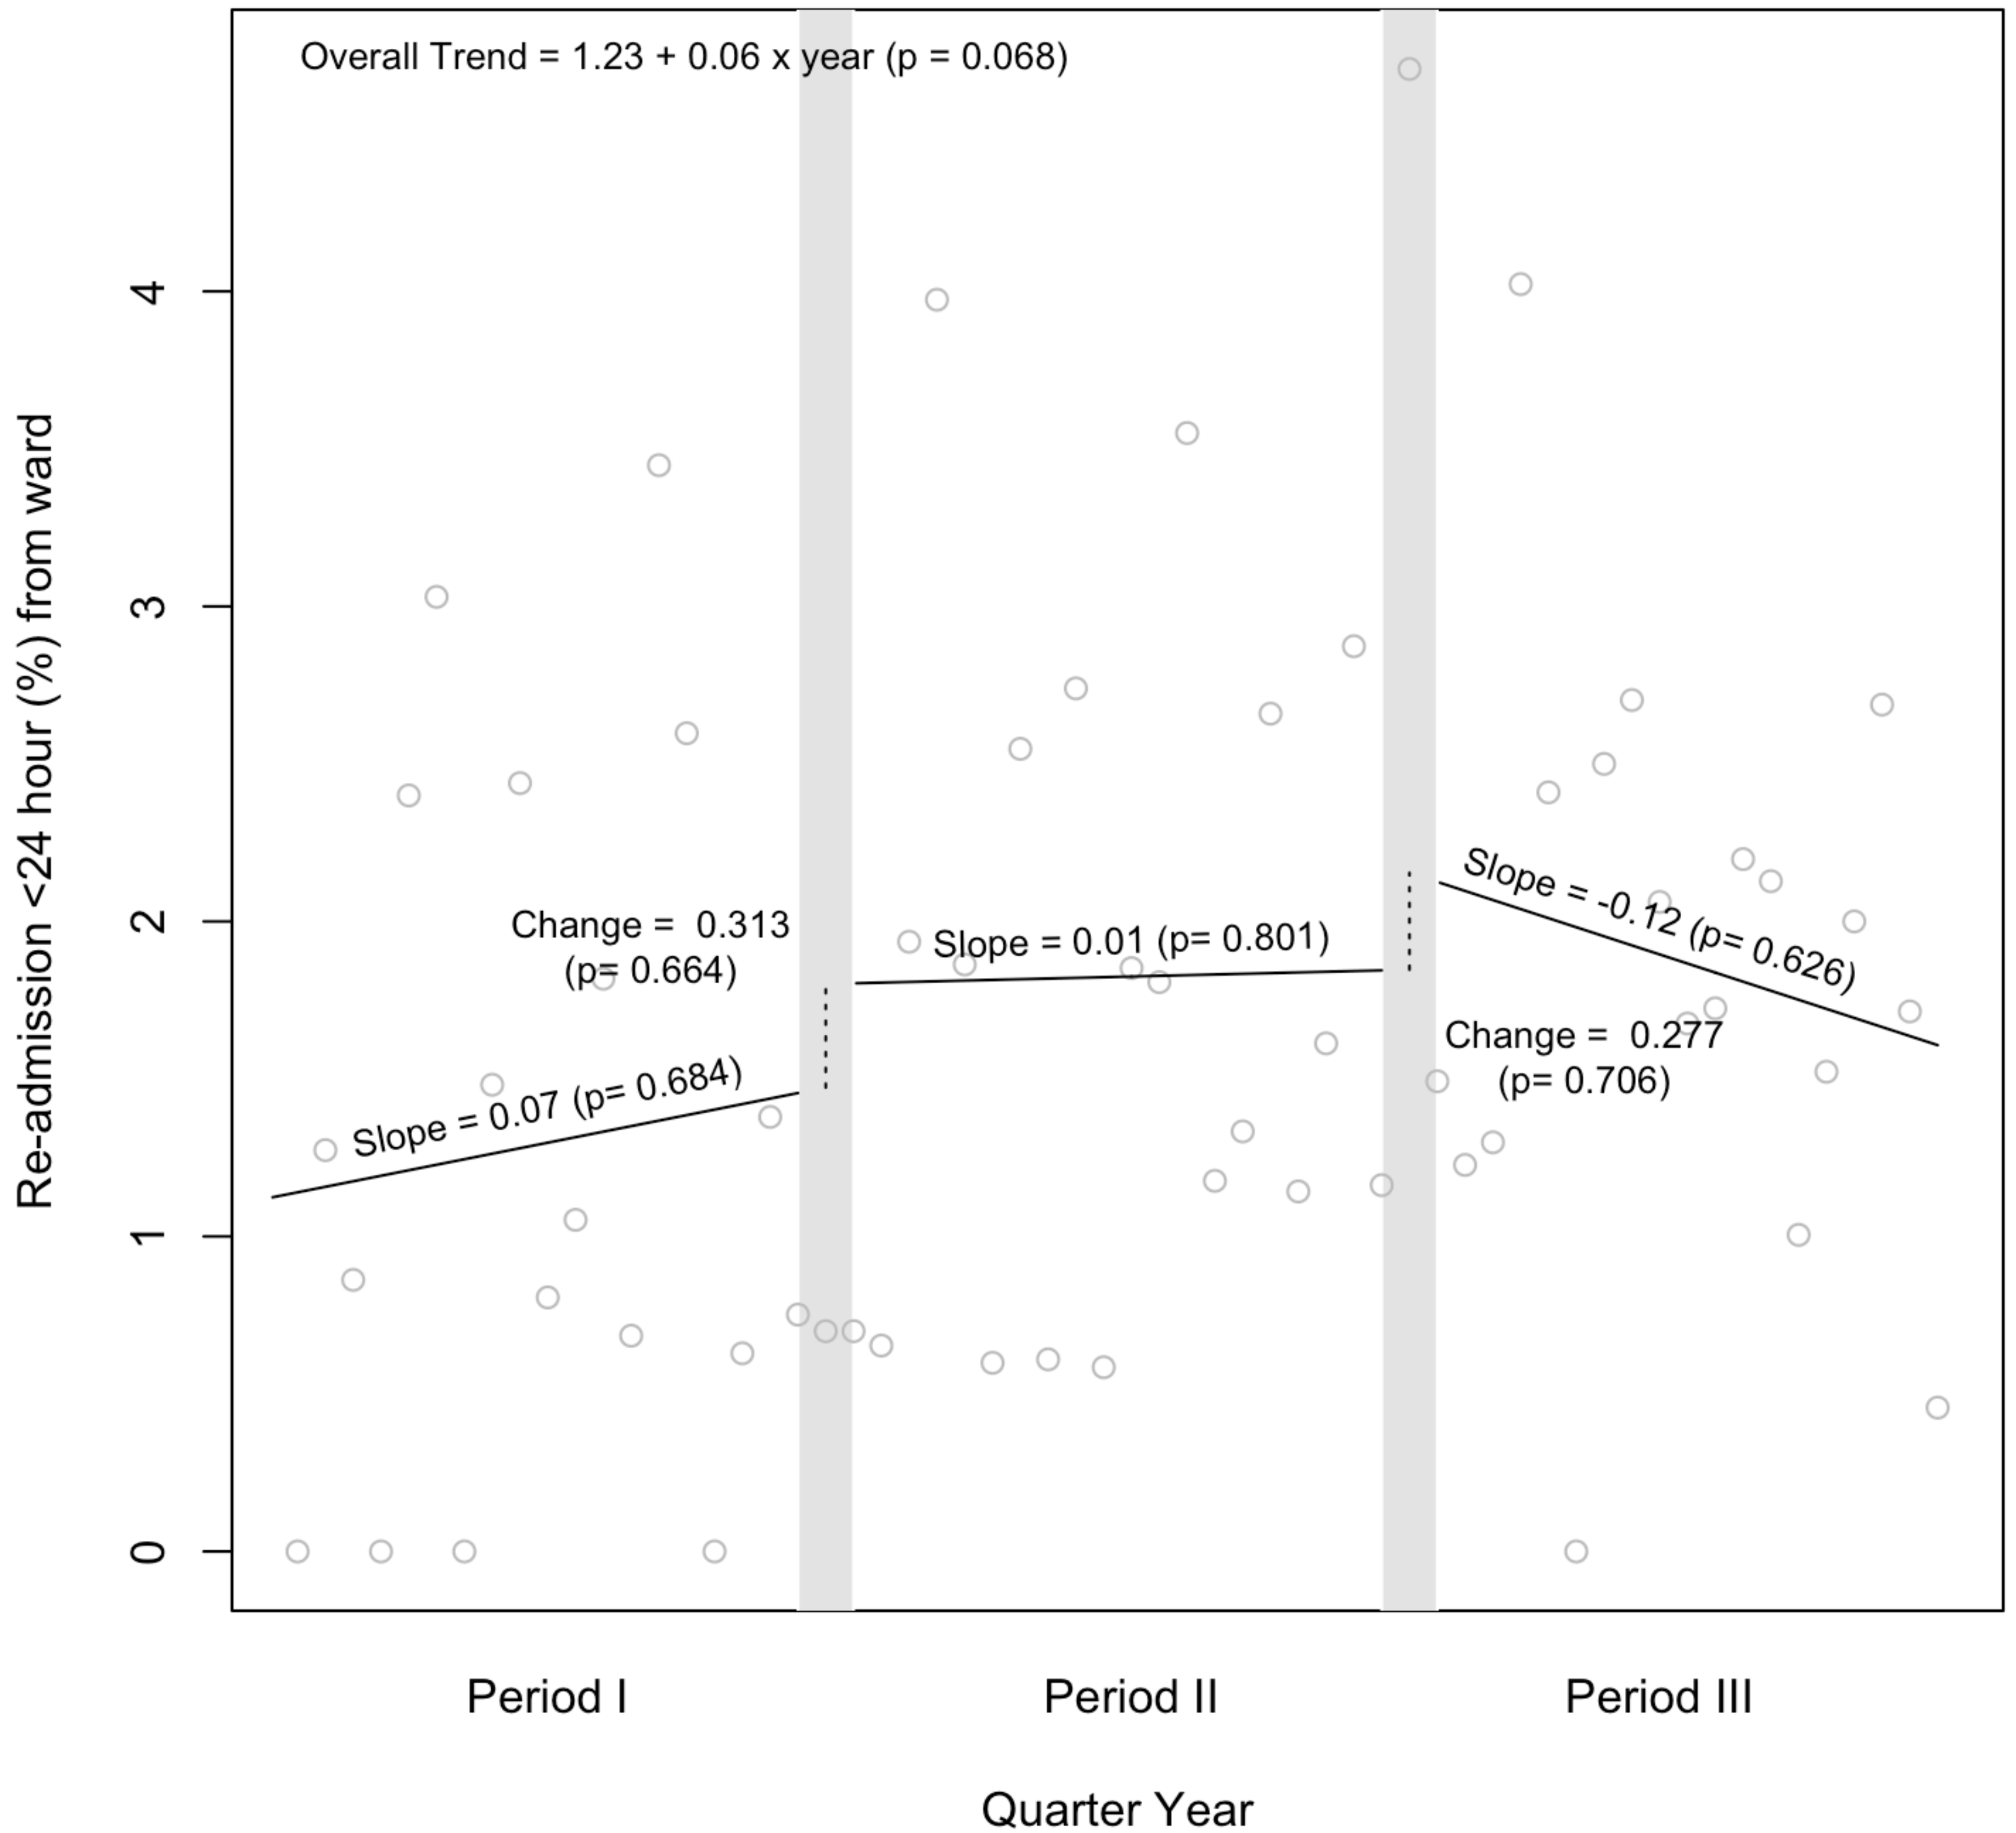

# Unplanned Mortality (%)

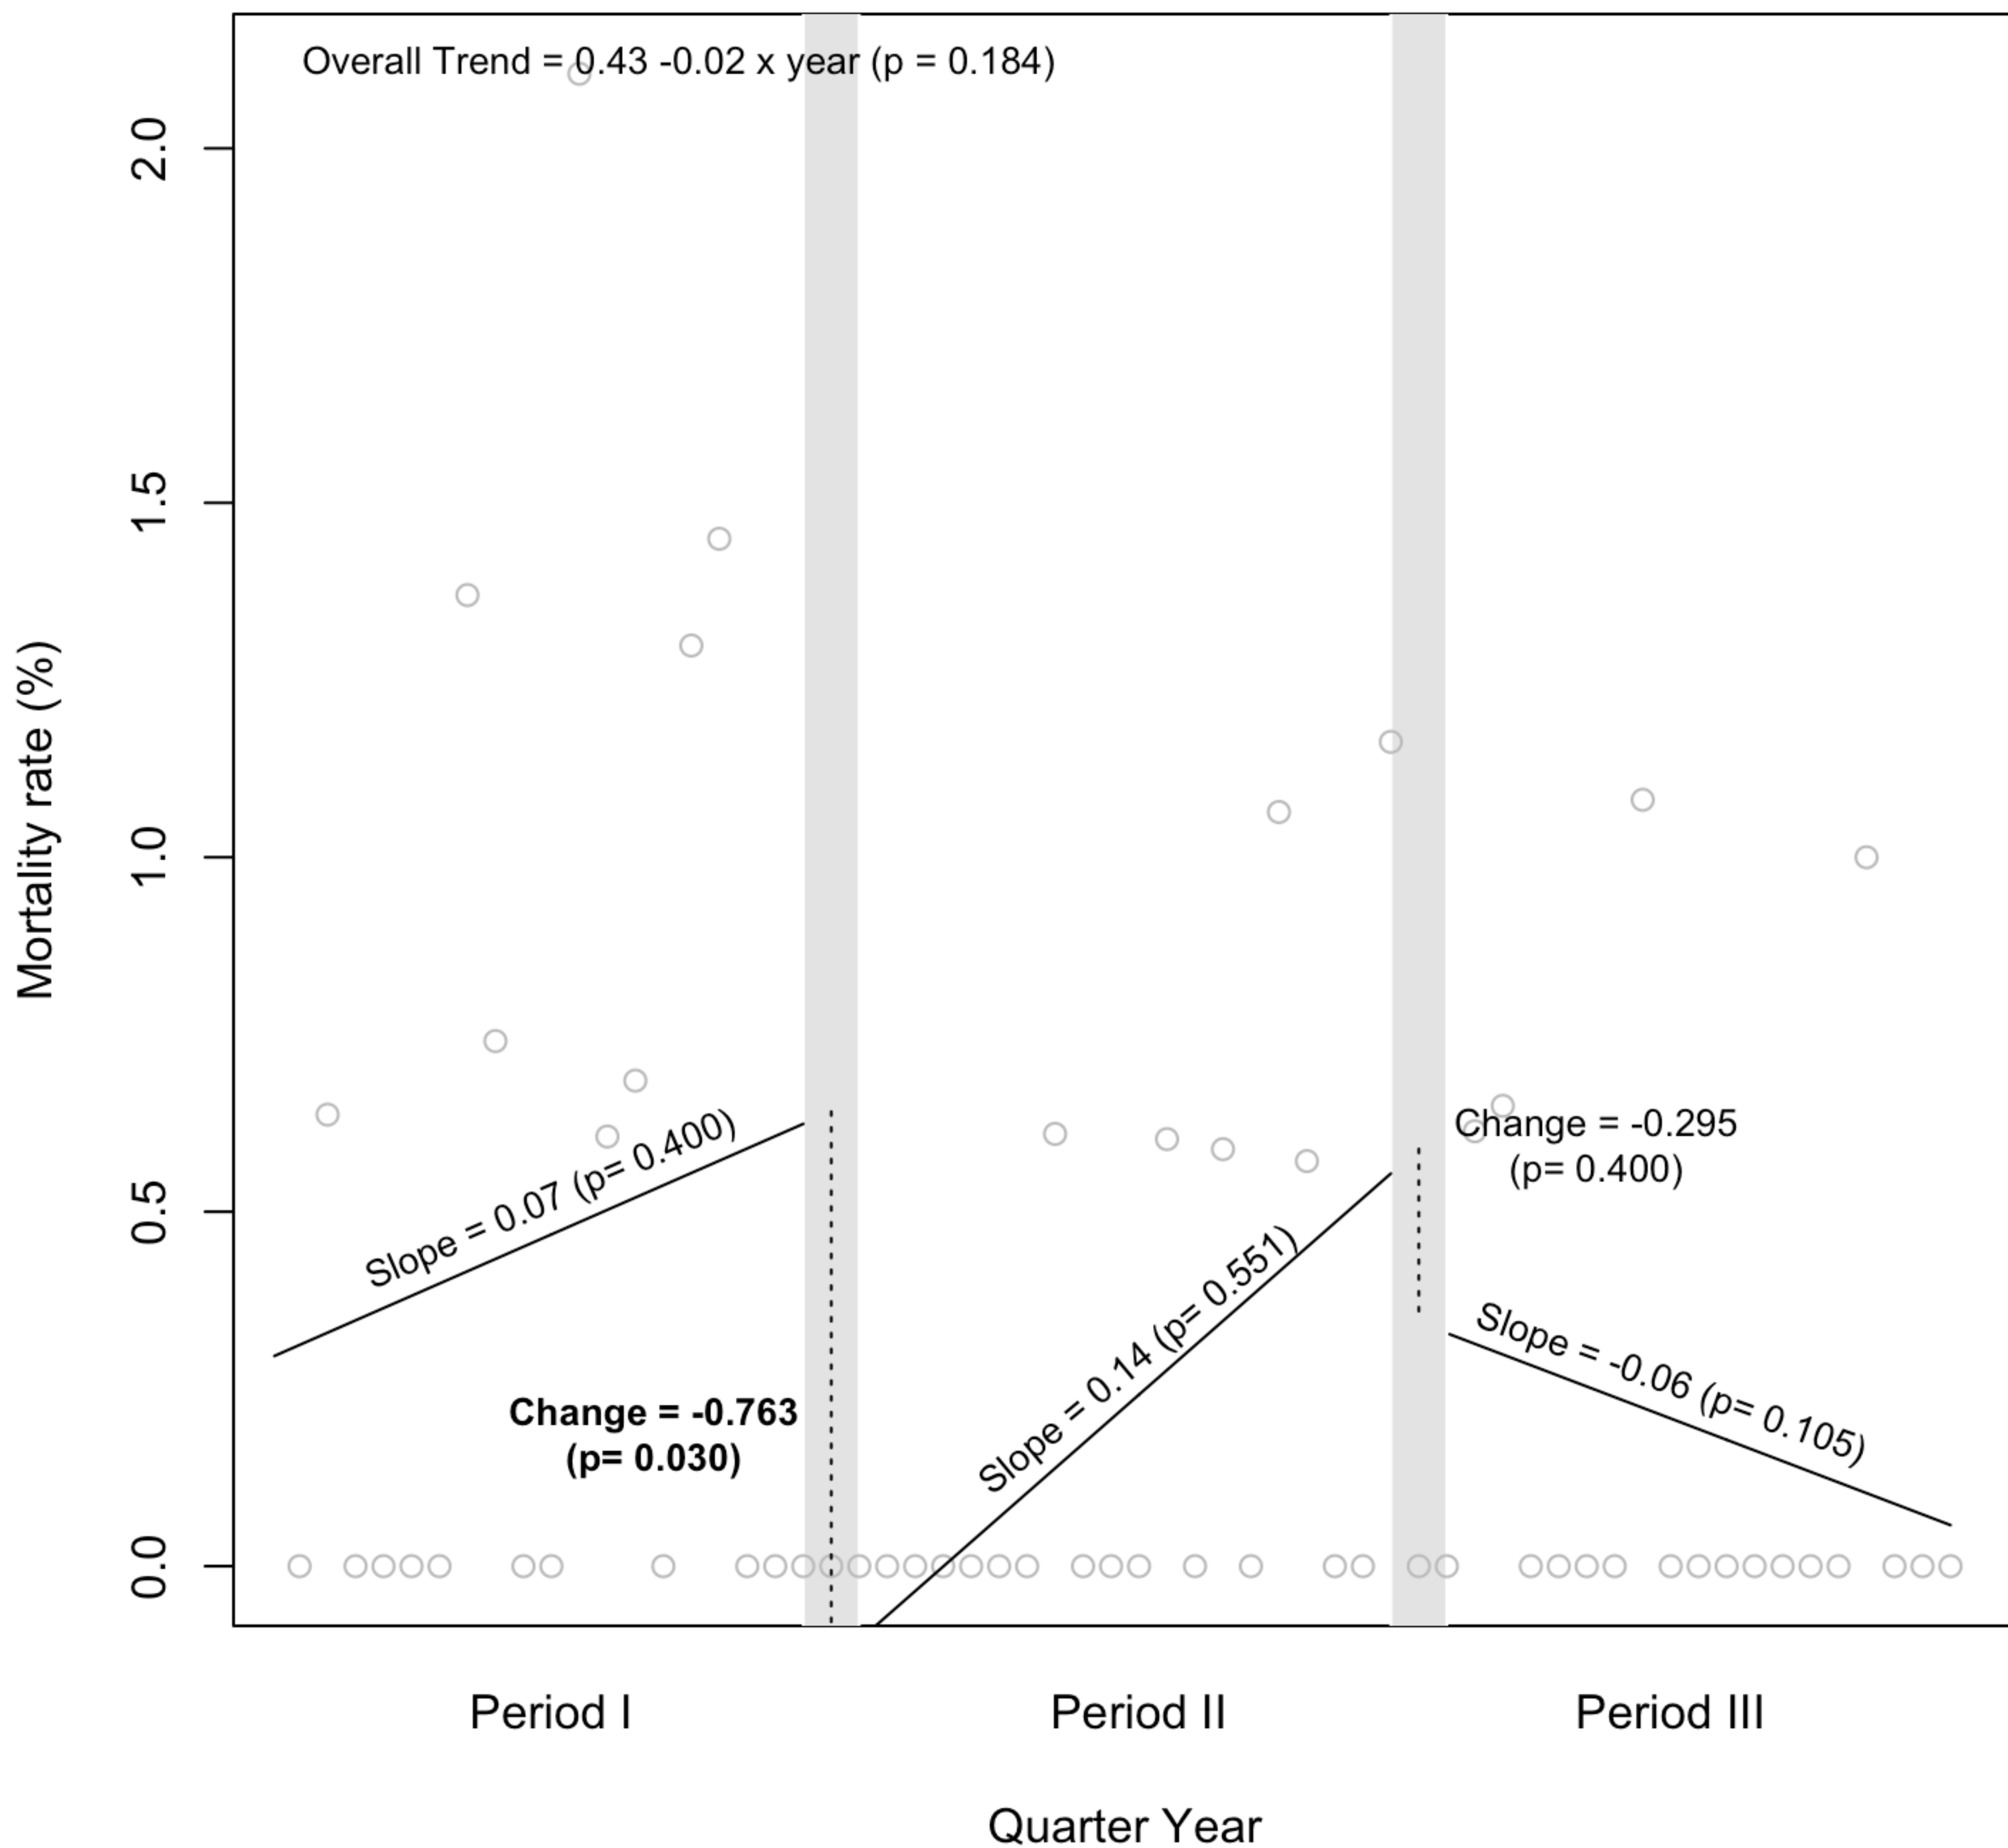

Supplement: inline-supplementary-material-1 [file inline-supplementary-material-1.pdf]
